# Supplementary material for: Dehydromethylation of alkali metal salts of the utility amide 2,2,6,6-tetramethylpiperidide (TMP)
Source: Royal Society of Chemistry journal article supplement (doi:10.1039/c4cc04959d), 2014-07-24
Supplement: c4cc04959d1.pdf [file c4cc04959d1.pdf]

**Dehydromethylation of utility amide 2,2,6,6-tetramethylpiperidide  
(TMP) to aza-allyl 2,2,6-trimethyl-1,2,3,4-tetrahydropyridide  
(TTHP): synthesis of a homologous series of alkali metal (Li, Na, K)  
TTHP compounds**

Alan R. Kennedy,<sup>a</sup> Sarah M. Leenhouts,<sup>a</sup> John J. Liggat,<sup>a</sup> Antonio J. Martínez-  
Martínez,<sup>a</sup> Kimberley Miller,<sup>a</sup> Robert E. Mulvey,<sup>\*a</sup> Charles T. O'Hara,<sup>\*a</sup>  
Philip O'Keefe,<sup>b</sup> and Alan Steven<sup>b</sup>

<sup>a</sup> WestCHEM, Department of Pure and Applied Chemistry, University of Strathclyde,  
Glasgow, G1 1XL, UK. E-mail: [r.e.mulvey@strath.ac.uk](mailto:r.e.mulvey@strath.ac.uk);  
[charlie.ohara@strath.ac.uk](mailto:charlie.ohara@strath.ac.uk).

<sup>b</sup> Chemical Development, AstraZeneca, Silk Road Business Park, Charter Way,  
Macclesfield, SK10 2NA, UK.

## Contents

|                                                                                                                                                                                                                                                                                                      |    |
|------------------------------------------------------------------------------------------------------------------------------------------------------------------------------------------------------------------------------------------------------------------------------------------------------|----|
| General Procedures .....                                                                                                                                                                                                                                                                             | 5  |
| Chart S1. Atom labelling used in NMR data (TTHP = 2,2,6-trimethyl-1,2,3,4-tetrahydropyridide) .....                                                                                                                                                                                                  | 5  |
| <i>In situ</i> preparation of [Li(TTHP)] ( <b>1</b> ) .....                                                                                                                                                                                                                                          | 6  |
| Synthesis of [TMEDA·Li(TTHP)] ( <b>1·TMEDA</b> ) .....                                                                                                                                                                                                                                               | 6  |
| Synthesis of [Na(TTHP)] ( <b>2</b> ) .....                                                                                                                                                                                                                                                           | 7  |
| Synthesis of [TMEDA·Na(TTHP)] <sub>2</sub> ( <b>2·TMEDA</b> )                                                                                                                                                                                                                                        |    |
| [equimolar amount of TMEDA] .....                                                                                                                                                                                                                                                                    | 7  |
| [excess of TMEDA (3 equiv)] .....                                                                                                                                                                                                                                                                    | 7  |
| Synthesis of [K(TTHP)] ( <b>3</b> ) .....                                                                                                                                                                                                                                                            | 8  |
| Synthesis of 2,2,6-trimethyl-2,3,4,5-tetrahydropyridine ( <b>4</b> ) .....                                                                                                                                                                                                                           | 9  |
| Alternative synthesis of 2,2,6-trimethyl-2,3,4,5-tetrahydropyridine ( <b>4</b> ).....                                                                                                                                                                                                                | 9  |
| Control reaction in absence of alkali metal .....                                                                                                                                                                                                                                                    | 9  |
| <b>Crystal Structure Determinations</b> .....                                                                                                                                                                                                                                                        | 10 |
| Table S1. Selected crystallographic and refinement data for <b>1·TMEDA</b> and <b>2·TMEDA</b> .....                                                                                                                                                                                                  | 10 |
| Figure S1. Molecular structure of <b>1·TMEDA</b> .....                                                                                                                                                                                                                                               | 11 |
| Figure S2. Molecular structure of <b>2·TMEDA</b> .....                                                                                                                                                                                                                                               | 12 |
| Table S2. Selected bond lengths (Å) and angles (°) for <b>1·TMEDA</b> and <b>2·TMEDA</b> .....                                                                                                                                                                                                       | 13 |
| <b>NMR Spectra</b> .....                                                                                                                                                                                                                                                                             | 14 |
| Figure S3. <sup>1</sup> H NMR Spectrum ( <i>d</i> <sub>8</sub> -THF, 300K, 400.1 MHz) of aliquot of reaction mixture in the absence of TMEDA after 18 h under reflux conditions in methylcyclohexane showing incomplete conversion of LiTMP (75 % approx.) to LiTTHP ( <b>1</b> , 25% approx.).....  | 14 |
| Figure S4. <sup>7</sup> Li NMR Spectrum ( <i>d</i> <sub>8</sub> -THF, 300K, 155.5 MHz) of aliquot of reaction mixture in the absence of TMEDA after 18 h under reflux conditions in methylcyclohexane showing incomplete conversion of LiTMP (75 % approx.) to LiTTHP ( <b>1</b> , 25% approx.)..... | 14 |
| Figure S5. <sup>1</sup> H NMR Spectrum ( <i>d</i> <sub>8</sub> -THF, 300K, 400.1 MHz) of aliquot of reaction mixture showing quantitative conversion of TMEDA·LiTMP to TMEDA·Li(TTHP) ( <b>1·TMEDA</b> ) .....                                                                                       | 15 |
| Figure S6. <sup>1</sup> H NMR spectrum ( <i>d</i> <sub>8</sub> -THF, 300K, 400.1 MHz) of isolated crystals of [TMEDA·Li(TTHP)] ( <b>1·TMEDA</b> ) .....                                                                                                                                              | 15 |
| Figure S7. <sup>7</sup> Li NMR Spectrum ( <i>d</i> <sub>8</sub> -THF, 300K, 155.5 MHz) of isolated crystals of [TMEDA·Li(TTHP)] ( <b>1·TMEDA</b> ) .....                                                                                                                                             | 16 |
| Figure S8. <sup>13</sup> C NMR Spectrum ( <i>d</i> <sub>8</sub> -THF, 300K, 100.60 MHz) of isolated crystals of [TMEDA·Li(TTHP)] ( <b>1·TMEDA</b> ) .....                                                                                                                                            | 16 |
| Figure S9. <sup>1</sup> H NMR Spectrum ( <i>d</i> <sub>8</sub> -THF, 300K, 400.1 MHz) of oil formed in reaction mixture of [TMEDA·Li(TTHP)] ( <b>1·TMEDA</b> ).....                                                                                                                                  | 17 |
| Figure S10. <sup>1</sup> H NMR spectrum ( <i>d</i> <sub>8</sub> -THF, 300K, 400.1 MHz) of isolated NaTTHP ( <b>2</b> ).....                                                                                                                                                                          | 17 |

|                                                                                                                                                                                                                                                                    |           |
|--------------------------------------------------------------------------------------------------------------------------------------------------------------------------------------------------------------------------------------------------------------------|-----------|
| Figure S11. $^{13}\text{C}$ NMR Spectrum ( $d_8$ -THF, 300K, 100.60 MHz) of isolated NaTTHP ( <b>2</b> ).....                                                                                                                                                      | 18        |
| Figure S12. $^1\text{H}$ NMR spectrum ( $d_8$ -THF, 300K, 400.1 MHz) of isolated crystals of [TMEDA·Na(TTHP)] ( <b>2·TMEDA</b> ) .....                                                                                                                             | 18        |
| Figure S13. $^1\text{H}$ NMR spectrum ( $\text{C}_6\text{D}_6$ , 300K, 400.1 MHz) of isolated crystals of [TMEDA·Na(TTHP)] ( <b>2·TMEDA</b> ) .....                                                                                                                | 19        |
| Figure S14. $^{13}\text{C}$ NMR Spectrum ( $d_8$ -THF, 300K, 100.60 MHz) of isolated crystals of [TMEDA·Na(TTHP)] ( <b>2·TMEDA</b> ) .....                                                                                                                         | 19        |
| Figure S15. $^1\text{H}$ NMR spectrum ( $d_8$ -THF, 300K, 400.1 MHz) of KTTHP ( <b>3</b> )....                                                                                                                                                                     | 20        |
| Figure S16. $^{13}\text{C}$ NMR Spectrum ( $d_8$ -THF, 300K, 100.60 MHz) of isolated KTTHP ( <b>3</b> ).....                                                                                                                                                       | 20        |
| Figure S17. $^1\text{H}$ NMR spectrum ( $\text{CDCl}_3$ , 300K, 400.1 MHz) of 2,2,6-trimethyl-2,3,4,5-tetrahydropyridine ( <b>4</b> ).....                                                                                                                         | 21        |
| Figure S18. $^{13}\text{C}$ NMR Spectrum ( $\text{CDCl}_3$ , 300K, 100.60 MHz) of 2,2,6-trimethyl-2,3,4,5-tetrahydropyridine ( <b>4</b> ).....                                                                                                                     | 21        |
| Figure S19. $^1\text{H}$ , $^1\text{H}$ -COSY NMR Spectrum ( $\text{CDCl}_3$ , 300K, 100.60 MHz) of 2,2,6-trimethyl-2,3,4,5-tetrahydropyridine ( <b>4</b> ).....                                                                                                   | 22        |
| Figure S20. $^1\text{H}$ , $^{13}\text{C}$ -HSQC NMR Spectrum ( $\text{CDCl}_3$ , 300K, 100.60 MHz) of 2,2,6-trimethyl-2,3,4,5-tetrahydropyridine ( <b>4</b> ) .....                                                                                               | 22        |
| Figure S21. $^1\text{H}$ NMR study ( $\text{CDCl}_3$ , 300K, 400.1 MHz) of a control reaction in the absence of alkali metal. TMP(H) (up), <i>in situ</i> reaction mixture from TMP(H) and methylcyclohexane before (middle) and after 24 h at 101 °C (down) ..... | 23        |
| <b><math>^1\text{H}</math> DOSY NMR Studies .....</b>                                                                                                                                                                                                              | <b>24</b> |
| $^1\text{H}$ DOSY NMR Samples Preparation.....                                                                                                                                                                                                                     | 24        |
| $^1\text{H}$ DOSY NMR study of compound <b>1·TMEDA</b> in $\text{C}_6\text{D}_6$ solution .....                                                                                                                                                                    | 25        |
| Figure S22. $^1\text{H}$ DOSY NMR plot of <b>1·TMEDA</b> in $\text{C}_6\text{D}_6$ solution .....                                                                                                                                                                  | 25        |
| Table S3. Diffusion coefficients and MW of internal standards .....                                                                                                                                                                                                | 25        |
| Figure S23. Calibration graph used to estimate of MW of compound <b>1·TMEDA</b> in $\text{C}_6\text{D}_6$ solution .....                                                                                                                                           | 26        |
| Table S4. Diffusion coefficients and corresponding calculated $\text{MW}_{\text{DOSY}}$ for components present in $\text{C}_6\text{D}_6$ solution .....                                                                                                            | 26        |
| Table S5. Comparison of $\text{MW}_{\text{DOSY}}$ to the MW of possible species.....                                                                                                                                                                               | 26        |
| $^1\text{H}$ DOSY NMR study of compound <b>1·TMEDA</b> in $d_8$ -THF solution .....                                                                                                                                                                                | 28        |
| Figure S24. DOSY NMR plot of <b>1·TMEDA</b> in $d_8$ -THF solution .....                                                                                                                                                                                           | 28        |
| Table S6. Diffusion coefficients and MW of internal standards .....                                                                                                                                                                                                | 28        |
| Figure S25. Calibration graph used to estimate MW of compound <b>1·TMEDA</b> in $d_8$ -THF solution .....                                                                                                                                                          | 29        |
| Table S7. Diffusion coefficients and corresponding calculated $\text{MW}_{\text{DOSY}}$ for components present in $d_8$ -THF solution .....                                                                                                                        | 29        |
| Table S8. Comparison of $\text{W}_{\text{DOSY}}$ to the MW of possible species .....                                                                                                                                                                               | 29        |
| $^1\text{H}$ DOSY NMR study of compound <b>Na·TTHP (2)</b> in $d_8$ -THF solution.....                                                                                                                                                                             | 31        |
| Figure S26. $^1\text{H}$ DOSY NMR plot of <b>2</b> in $d_8$ -THF solution.....                                                                                                                                                                                     | 31        |
| Table S9. Diffusion coefficients and MW of internal standards for <b>2</b> .....                                                                                                                                                                                   | 31        |

|                                                                                                                                                      |           |
|------------------------------------------------------------------------------------------------------------------------------------------------------|-----------|
| Figure S27. Calibration graph used to estimate of MW of compound <b>2</b> in $d_8$ -THF solution.....                                                | 32        |
| Table S10. Diffusion coefficients and corresponding calculated MW <sub>DOSY</sub> for components present in $d_8$ -THF solution .....                | 32        |
| Table S11. Comparison of MW <sub>DOSY</sub> to the MW of possible species .....                                                                      | 32        |
| <sup>1</sup> H DOSY NMR study of compound TMEDA·NaTTHP ( <b>2·TMEDA</b> ) in $d_8$ -THF solution .....                                               | 33        |
| Figure S28. <sup>1</sup> H DOSY NMR plot of <b>2·TMEDA</b> in $d_8$ -THF solution .....                                                              | 33        |
| Table S12. Diffusion coefficients and MW of internal standards for <b>2b</b> .....                                                                   | 33        |
| Figure S29. Calibration graph used to estimate MW of compound <b>2·TMEDA</b> in $d_8$ -THF solution.....                                             | 34        |
| <sup>1</sup> H DOSY NMR study of compound TMEDA·NaTTHP ( <b>2·TMEDA</b> ) in C <sub>6</sub> D <sub>6</sub> solution .....                            | 35        |
| Figure S30. <sup>1</sup> H DOSY NMR plot of <b>2·TMEDA</b> in C <sub>6</sub> D <sub>6</sub> solution.....                                            | 35        |
| Table S13. Diff. coefficients and MW of internal standards for <b>2·TMEDA</b> .....                                                                  | 35        |
| Figure S31. Calibration graph used to estimate MW of compound <b>2·TMEDA</b> in C <sub>6</sub> D <sub>6</sub> solution.....                          | 36        |
| <sup>1</sup> H DOSY NMR study of compound KTTHP ( <b>3</b> ) in $d_8$ -THF solution.....                                                             | 37        |
| Figure S32. <sup>1</sup> H DOSY NMR plot of <b>3</b> in $d_8$ -THF solution .....                                                                    | 37        |
| Table S14. Diffusion coefficients and MW of internal standards for <b>3</b> .....                                                                    | 37        |
| Figure S33. Calibration graph used to estimate MW of compound <b>3</b> in $d_8$ -THF solution .....                                                  | 38        |
| <b>IR Spectra .....</b>                                                                                                                              | <b>39</b> |
| Figure S34. IR spectra (KBr, Nujol) for NaTTHP ( <b>2</b> ) and KTTHP ( <b>3</b> ) .....                                                             | 39        |
| Figure S35. IR spectra (KBr, Nujol) for TMEDA·LiTTHP ( <b>1·TMEDA</b> ) and TMEDA·NaTTHP ( <b>2·TMEDA</b> ) .....                                    | 39        |
| Figure S36. IR spectra (KBr, Nujol) for 2,2,6-trimethyl-2,3,4,5-tetrahydropyridine ( <b>4</b> ) .....                                                | 40        |
| <b>Thermal Volatilisation Analysis (TVA) .....</b>                                                                                                   | <b>41</b> |
| Description of TVA Technique .....                                                                                                                   | 41        |
| Figure S37. Schematic diagram of the TVA system .....                                                                                                | 42        |
| Figure S38. TVA thermogram for LiTMP. The solid line represents total volatile products, and the dashed line non-condensable volatile products ..... | 42        |
| Figure S39. Mass spectrum (TVA) non-condensable products released from LiTMP.....                                                                    | 43        |
| Figure S40. TVA thermogram for NaTMP. The solid line represents total volatile products, and the dashed line non-condensable volatile products ..... | 43        |
| Figure S41. Mass spectrum (TVA) non-condensable products released from NaTMP.....                                                                    | 44        |
| Figure S42. TVA thermogram for KTMP. The solid line represents total volatile products, and the dashed line non-condensable volatile products .....  | 44        |
| Figure S43. Mass spectrum (TVA) non-condensable products released from KTMP .....                                                                    | 45        |

|                                                                                                                                   |    |
|-----------------------------------------------------------------------------------------------------------------------------------|----|
| Figure S44. Sub-ambient TVA trace for LiTMP (condensable products) .....                                                          | 45 |
| Figure S45. Mass spectrum (TVA) corresponding to the first compound being<br>released from LiTMP (non-condensable products) ..... | 46 |
| Figure S46. Mass spectrum (TVA) corresponding to the second fraction released<br>from LiTMP (condensable products) .....          | 46 |
| Figure S47. Mass spectrum (TVA) corresponding to the third compound released<br>from LiTMP (condensable products).....            | 46 |
| <b>References</b> .....                                                                                                           | 46 |

## General Procedures

All reactions and manipulations were performed under a protective dry argon atmosphere using standard Schlenk techniques unless otherwise stated. Methylcyclohexane was distilled over sodium metal and stored with molecular sieves (4 Å) under nitrogen prior to use. *cyc*-C<sub>6</sub>D<sub>12</sub>, *d*<sub>8</sub>-THF and C<sub>6</sub>D<sub>6</sub> were degassed and stored over 4 Å molecular sieves prior to use. CDCl<sub>3</sub> was stored over 4 Å molecular sieves. NMR spectra were recorded at 300 K on Bruker Avance and DPX 400 MHz NMR spectrometers, operating at 400.1, 155.5 and 100.6 MHz for <sup>1</sup>H, <sup>7</sup>Li and <sup>13</sup>C, respectively. <sup>1</sup>H and <sup>13</sup>C chemical shifts (ppm) were referred to residual solvent signals, and <sup>7</sup>Li NMR spectra were referenced against an external standard solution of LiCl in D<sub>2</sub>O (1 M, δ = 0 ppm). The assignments of the <sup>1</sup>H and <sup>13</sup>C{<sup>1</sup>H} NMR spectra were made with the help of COSY, HMBC, and HSQC experiments. Despite several attempts, satisfactory elemental analyses of the compounds **1·TMEDA**, **2**, **2·TMEDA**, and **3**, carried out using a Perkin Elmer 2400 elemental analyser, could not be obtained due to their high air- and moisture-sensitive nature. Mass spectra (EI GCMS) for **4** was recorded on a Polaris Q from Thermo with helium as a carrier gas at 1ml/min and using an Agilent HP5-MS column (30m x 0.25mm x 0.25μm). Infrared spectra were recorded in the range 4000–200 cm<sup>-1</sup> on a Perkin-Elmer Spectrum 100 spectrophotometer, and the samples were prepared within an argon-filled glove box using Nujol mulls between KBr plates. *n*BuLi (1.6M in hexanes, Aldrich) was titrated prior to use. TMEDA (N,N,N',N'-tetramethylethylenediamine, Aldrich) was distilled over CaH<sub>2</sub> under nitrogen atmosphere and stored over activated molecular sieves (4 Å). TMP(H) (2,2,6,6-tetramethylpiperidine, Merck KGaA) was stored over activated molecular sieves (4 Å) prior to use. *n*-BuNa,<sup>1</sup> and Me<sub>3</sub>SiCH<sub>2</sub>K<sup>2</sup> were prepared according to literature methods.

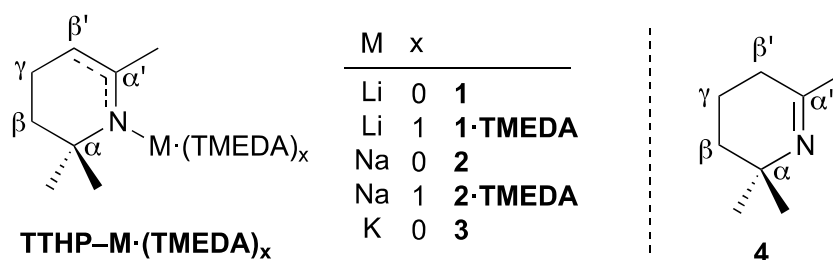

**Chart S1.** Atom labelling used in NMR data (TTHP = 2,2,6-trimethyl-1,2,3,4-tetrahydropyridide).

### ***In situ* preparation of [Li(TTHP)] (1).**

To a Schlenk flask under argon was added *n*BuLi (2.5 mL of a 1.6M solution in hexane, 4 mmol) followed by TMP(H) (0.68 mL, 4mmol) via syringe. The resulting mixture was stirred for 15 min during which time an off-white precipitate formed in the mixture. Methylcyclohexane (20 mL) was added via syringe and the yellow solution was then heated to reflux. NMR spectroscopic analysis of an aliquot of the reaction mixture after 18h under reflux conditions showed a conversion of 25% (approx.) of LiTMP into **1** (see Fig. S3). Several attempts to improve the demethylation conditions and crystallization of **1** were unsuccessful. <sup>1</sup>H NMR (400.1 MHz, *d*<sub>8</sub>-THF, 300 K, *reaction mixture*): δ, **1** (25% approx.), 1.02 (s, 6H, CMe<sub>2</sub>), 1.17 (t, 2H, <sup>3</sup>*J*(H,H) = 6.6 Hz, β-CH<sub>2</sub>), 1.57 (s, 3H, Me'), 2.05 (m, 2H, γ-CH<sub>2</sub>), 3.37 (m, 1H, β'-CH); LiTMP (75% approx.), 1.08 (s, 12H, 4 x Me), 1.21 (t, 4H, <sup>3</sup>*J*(H,H) = 6.1 Hz, β-CH<sub>2</sub>) 1.59-1.70 (m including 2H, γ-CH<sub>2</sub>); signals for TMP(H) are also observed due to unavoidable hydrolysis of LiTMP during NMR analysis. <sup>7</sup>Li NMR (155.5 MHz, *d*<sub>8</sub>-THF, 300 K, *reaction mixture*): δ, 1.12, 2.14 (v br).

### **Synthesis of [TMEDA·Li(TTHP)] (1·TMEDA).**

To a Schlenk flask under argon was added *n*BuLi (2.5 mL of a 1.6M solution in hexane, 4 mmol) followed by TMP(H) (0.68 mL, 4 mmol) via syringe. The resulting pale yellow solution was stirred for 15 min during which time an off-white precipitate formed in the reaction mixture. Methylcyclohexane (20 mL) was added via syringe followed by TMEDA (1.2 mL, 8 mmol) to give a pale yellow solution (*c.a.* 2 equivalents was required). The reaction mixture was then heated to reflux for 18 h after which the mixture was a dark orange solution containing a brown oily material. NMR spectroscopic analysis of an aliquot of the reaction mixture showed quantitative dehydromethylation to TMEDA·LiTTHP (**1·TMEDA**, see Fig. S4). The solution was separated from the oil via cannula and cooled to -25 °C for 15 h to yield a small crop of suitable XRD quality orange crystals of **1·TMEDA** (typical yield 160 mg, 0.65 mmol, 16%). <sup>1</sup>H and <sup>7</sup>Li NMR spectroscopic analysis of the brown oil reveals the presence of a characteristic LiTTHP:TMEDA resonances in a 1:1 ratio (approx.) which resemble those signals of the crystalline material (see Fig. S9). <sup>1</sup>H NMR (400.1 MHz, *d*<sub>8</sub>-THF, 300 K): δ 0.99 (s, 6H, CMe<sub>2</sub>), 1.17 (t, 2H, <sup>3</sup>*J*(H,H) = 6.6 Hz, β-CH<sub>2</sub>), 1.55 (s, 3H, α'-CMe), 2.07 (m, 2H, γ-CH<sub>2</sub>), 2.15 (s, 12H, TMEDA-CH<sub>3</sub>), 2.30 (s, 4H,

TMEDA-CH<sub>2</sub>), 3.31 (m, 1H,  $\beta'$ -CH). <sup>13</sup>C{<sup>1</sup>H} NMR (100.6 MHz, *d*<sub>8</sub>-THF, 300 K):  $\delta$  23.2 ( $\gamma$ -CH<sub>2</sub>), 26.1 ( $\alpha'$ -CMe), 30.7 ( $\alpha$ -CMe<sub>2</sub>), 38.2 ( $\beta$ -CH<sub>2</sub>), 46.0 (TMEDA-CH<sub>3</sub>), 51.2 ( $\alpha$ -CMe<sub>2</sub>), 58.7 (TMEDA-CH<sub>2</sub>), 76.5 ( $\beta'$ -CH), 149.4 ( $\alpha'$ -CMe). <sup>7</sup>Li NMR (155.5 MHz, *d*<sub>8</sub>-THF, 300 K):  $\delta$  1.10. IR (Nujol, cm<sup>-1</sup>):  $\nu$ (NC=C), 1575.

**Synthesis of [Na(TTHP)] (2).** Freshly prepared *n*-BuNa (320 mg, 4 mmol) was suspended in methylcyclohexane (20 mL) and TMP(H) (0.68 mL, 4 mmol) was added via syringe. The resulting pale yellow suspension was heated to reflux to give a solution which turned into a pale brown suspension after 5 min under reflux. The reaction mixture was refluxed for 12 h and the resulting suspension was filtered. The collected solid was washed with *n*-hexane (5 mL) and dried under vacuum to give **2** as a pale brown solid (480 mg, 3.26 mmol, 82%). <sup>1</sup>H NMR (400.1 MHz, *d*<sub>8</sub>-THF, 300K):  $\delta$  0.98 (s, 6 H, CMe<sub>2</sub>), 1.17 (t, 2 H, <sup>3</sup>J<sub>HH</sub> = 6.5 Hz,  $\beta$ -CH<sub>2</sub>), 1.58 (s, 3 H,  $\alpha'$ -CMe), 2.09 (br m, 2 H,  $\gamma$ -CH<sub>2</sub>), 3.27 (t, 1 H, <sup>3</sup>J<sub>HH</sub> = 3.1 Hz,  $\beta'$ -CH). <sup>13</sup>C{<sup>1</sup>H} NMR (100.8 MHz, *d*<sub>8</sub>-THF, 300K):  $\delta$  23.5 ( $\gamma$ -CH<sub>2</sub>), 27.3 ( $\alpha'$ -CMe), 31.5 (CMe<sub>2</sub>), 38.3 ( $\beta$ -CH<sub>2</sub>), 51.2 (CMe<sub>2</sub>), 74.9 ( $\beta'$ -CH), 150.8 ( $\alpha'$ -C). IR (Nujol, cm<sup>-1</sup>):  $\nu$ (NC=C), 1538.

**Synthesis of [TMEDA·Na(TTHP)]<sub>2</sub> (2·TMEDA) [equimolar amount of TMEDA].** Freshly prepared *n*-BuNa (400 mg, 5 mmol) was suspended in methylcyclohexane (20 mL) and TMP(H) (0.85 mL, 5 mmol) was added. The resulting pale yellow suspension was stirred for 30 min and then TMEDA (0.75 mL, 5 mmol) was added via syringe. The reaction mixture was stirred for 30 min at room temperature and then it was refluxed for 6 h to give a dark orange slight suspension which was filtered through Celite. The resulting orange solution was concentrated in vacuo (*c.a.* 5 mL) and upon standing at room temperature for 48 h afforded **2·TMEDA** as a crystalline material suitable for XRD studies. Crystalline **2·TMEDA** was filtered and washed with *n*-hexane (5 mL) and dried under vacuum (950 mg, 2.17 mmol, 87%). The filtrate was concentrated under vacuum to dryness to give a dark brown foam (90 mg, 0.21 mmol, 8%) which NMR data resembles that of the crystalline material, proving that the reaction is near quantitative (95%).

**Synthesis of [TMEDA·Na(TTHP)]<sub>2</sub> (2·TMEDA) [excess of TMEDA (3 equiv)].** Freshly prepared *n*-BuNa (320 mg, 4 mmol) was suspended in methylcyclohexane (20 mL) and TMP(H) (0.68 mL, 4 mmol) was added. The resulting pale yellow



suspension was stirred for 30 min and then an excess of TMEDA (1.8 mL, 12 mmol) was added in order to achieve a solution which was additionally stirred for 30 min at room temperature and then refluxed for 6 h to give a dark orange solution. The reaction mixture was concentrated under vacuum (c.a. 5 mL) and placed at -27°C for 24 h to give **2·TMEDA** as a crystalline material suitable for XRD studies. Crystalline **2·TMEDA** was filtered, washed with *n*-hexane (5 mL) and dried under vacuum (620 mg, 1.41 mmol, 71%). The filtrate was concentrated under vacuum to dryness to give a dark brown foam (103 mg, 0.23 mmol, 10%) which NMR data resembles that of the crystalline material, proving that the reaction is almost quantitative (81%). XRD studies isolated crystalline material revealed that **2·TMEDA** crystallise, in both cases, within the same dimeric structure. <sup>1</sup>H NMR (400.1 MHz, *d*<sub>8</sub>-THF, 300K): δ 0.96 (s, 6 H, *CMe*<sub>2</sub>), 1.16 (t, 2 H, <sup>3</sup>*J*<sub>HH</sub> = 6.5 Hz, β-CH<sub>2</sub>), 1.56 (s, 3 H, α'-*CMe*), 2.11 (br m, 2 H, γ-CH<sub>2</sub>), 2.15 (s, 12 H, TMEDA-CH<sub>3</sub>), 2.30 (s, 4 H, TMEDA-CH<sub>2</sub>), 3.23 (t, 1 H, <sup>3</sup>*J*<sub>HH</sub> = 3.3 Hz, β'-CH). <sup>1</sup>H NMR (400.1 MHz, C<sub>6</sub>D<sub>6</sub>, 300K): δ 1.31 (s, 6 H, *CMe*<sub>2</sub>), 1.63 (t, 2 H, <sup>3</sup>*J*<sub>HH</sub> = 6.5 Hz, β-CH<sub>2</sub>), 1.97, 1.98 (both s, 3 H and 4 H, α'-*CMe* and TMEDA-CH<sub>2</sub>, respectively), 2.05 (s, 12 H, TMEDA-CH<sub>3</sub>), 2.73 (v br "dt", 2 H, γ-CH<sub>2</sub>), 4.04 (v br t, 1 H, β'-CH). <sup>13</sup>C{<sup>1</sup>H} NMR (100.8 MHz, *d*<sub>8</sub>-THF, 300K): δ 23.4 (γ-CH<sub>2</sub>), 28.5 (α'-*CMe*), 32.4 (*CMe*<sub>2</sub>), 37.9 (β-CH<sub>2</sub>), 46.0 (TMEDA-CH<sub>3</sub>), 51.3 (α-*CMe*<sub>2</sub>), 57.7 (TMEDA-CH<sub>2</sub>), 76.8 (β'-CH), 151.4 (α'-C). IR (Nujol, cm<sup>-1</sup>): ν(NC=C), 1569.

**Synthesis of [K(TTHP)] (3).** Freshly prepared KCH<sub>2</sub>SiMe<sub>3</sub> (512 mg, 4 mmol) was suspended in methylcyclohexane (20 mL) and TMP(H) (0.68 mL, 4 mmol) was added via syringe. The resulting pale yellow suspension was stirred at room temperature for 30 min and then heated to reflux for 3h to give a pale brown suspension. The newly obtained suspension was filtered and the collected solid washed with *n*-hexane (5 mL) and dried under vacuum to give **3** as a pale brown solid (542 mg, 3.32 mmol, 83%). <sup>1</sup>H NMR (400.1 MHz, *d*<sub>8</sub>-THF, 300K): δ 0.93 (s, 6 H, *CMe*<sub>2</sub>), 1.11 (t, 2 H, <sup>3</sup>*J*<sub>HH</sub> = 6.4 Hz, β-CH<sub>2</sub>), 1.55 (s, 3 H, α'-*CMe*), 2.14 (br m, 2 H, γ-CH<sub>2</sub>), 3.14 (t, 1 H, <sup>3</sup>*J*<sub>HH</sub> = 3.2 Hz, β'-CH). <sup>13</sup>C{<sup>1</sup>H} NMR (100.8 MHz, *d*<sub>8</sub>-THF, 300K): δ 23.7 (γ-CH<sub>2</sub>), 26.8 (α'-*CMe*), 31.3 (α-*CMe*<sub>2</sub>), 38.1 (β-CH<sub>2</sub>), 51.3 (α-*CMe*<sub>2</sub>), 71.5 (β'-CH), 150.5 (α'-*CMe*). IR (Nujol, cm<sup>-1</sup>): ν(NC=C), 1538.

**Synthesis of 2,2,6-trimethyl-2,3,4,5-tetrahydropyridine (4).** Freshly prepared K(TTHP) **3** (1.63 g, 10 mmol) was suspended in *n*-hexane (20 mL) and distilled water was added dropwise (2 mL). The reaction mixture was stirred for 1h, dried over anhydrous MgSO<sub>4</sub> and filtered. The solvent was removed under vacuum to yield the titled compound **4** as a pale yellow liquid (1.1 g, 8.79 mmol, 88%).

**Alternative synthesis of 2,2,6-trimethyl-2,3,4,5-tetrahydropyridine (4).** Freshly prepared K(TTHP) **3** (1.63 g, 10 mmol) was suspended in *n*-hexane (20 mL) and 2,2,6,6-tetramethylpiperidine (TMPH, 1.7 mL, 10 mmol) was added via syringe. The resulting pale yellow suspension was stirred at room temperature for 30 min and then heated to reflux for 5h to give a pale brown suspension. Distilled water was added dropwise (1.5 mL) and the reaction mixture was stirred for 30 min, dried over anhydrous MgSO<sub>4</sub> and filtered. The solvent was removed under vacuum to yield the titled compound **4** as a pale yellow liquid (821 mg, 6.56 mmol, 83%). <sup>1</sup>H NMR (400.1 MHz, CDCl<sub>3</sub>, 300K):  $\delta$  1.12 (s, 6 H, CMe<sub>2</sub>), 1.40 (m, 2 H,  $\beta$ -CH<sub>2</sub>), 1.61 (m, 2 H,  $\gamma$ -CH<sub>2</sub>), 1.86 (s, 3 H,  $\alpha'$ -CMe), 2.00 (t, 1 H, <sup>3</sup>J<sub>HH</sub> = 6.8 Hz,  $\beta'$ -CH<sub>2</sub>). <sup>13</sup>C{<sup>1</sup>H} NMR (100.8 MHz, CDCl<sub>3</sub>, 300K):  $\delta$  16.5 ( $\gamma$ -CH<sub>2</sub>), 27.5 ( $\alpha'$ -CMe), 29.6 ( $\beta'$ -CH<sub>2</sub>), 30.1 ( $\alpha$ -CMe<sub>2</sub>), 33.8 ( $\beta$ -CH<sub>2</sub>), 53.2 ( $\alpha$ -CMe<sub>2</sub>), 164.9 ( $\alpha'$ -CMe). IR (Nujol, cm<sup>-1</sup>):  $\nu$ (NC=C), 1662. LRMS (GC/EI) *m/z* calc. for C<sub>8</sub>H<sub>16</sub>N [M+H-1e]<sup>+</sup>, 126.13; found, 126.12; calc. for C<sub>7</sub>H<sub>12</sub>N [M-CH<sub>3</sub>-1e]<sup>+</sup>, 110.09; found, 110.12; consistent with reported data.<sup>3</sup>

#### **Control reaction in absence of alkali metal.**

To a Schlenk flask under argon methylcyclohexane (20 mL) was added via syringe, followed by TMP(H) (1.36 mL, 8 mmol). The resulting solution was heated to reflux for 24 h after which <sup>1</sup>H NMR spectroscopic analysis of an aliquot of the reaction mixture was carried out. The spectrum obtained showed only signals due to TMP(H), indicating that no demethylation had occurred. <sup>1</sup>H NMR (400.1 MHz, CDCl<sub>3</sub>, 300K):  $\delta$  1.09 (s, 12 H, Me), 1.29 (m, 4 H,  $\beta$ -CH<sub>2</sub>), 1.62 (m, 2 H,  $\gamma$ -CH<sub>2</sub>).

## Crystal Structure Determinations

Single-crystal data were recorded at 123(2) K on Oxford Diffraction Xcalibur and Gemini Diffractometers with Mo- $K\alpha$  ( $\lambda = 0.71073$  Å; for **1·TMEDA**, Figure S1) and Cu- $K\alpha$  ( $\lambda = 1.5418$  Å; for **2·TMEDA**, Figure S2) radiation, respectively. The structures were refined to convergence on  $F^2$  and against all independent reflections by full-matrix least-squares using SHELXL programs.<sup>4</sup> Selected crystallographic parameters are given in Table S1 and full details are given in the deposited cif files. CCDC-1002045 (**1·TMEDA**) and CCDC-1002046 (**2·TMEDA**) contain the supplementary crystallographic data for this paper. These data can be obtained free of charge from the Cambridge Crystallographic Data Centre via [www.ccdc.cam.ac.uk/data\\_request/cif](http://www.ccdc.cam.ac.uk/data_request/cif).

**Table S1.** Selected crystallographic and refinement data for **1·TMEDA** and **2·TMEDA**.

| Compound                                  | <b>1·TMEDA</b>                                   | <b>2·TMEDA</b>                                                 |
|-------------------------------------------|--------------------------------------------------|----------------------------------------------------------------|
| Formula                                   | C <sub>14</sub> H <sub>30</sub> LiN <sub>3</sub> | C <sub>28</sub> H <sub>60</sub> N <sub>6</sub> Na <sub>2</sub> |
| MW                                        | 247.35                                           | 526.80                                                         |
| Cryst. System                             | Monoclinic                                       | Orthorhombic                                                   |
| Space Group                               | $P2_1/c$                                         | $Pbca$                                                         |
| Wavelength/Å                              | 0.71073                                          | 1.5418                                                         |
| $a/\text{Å}$                              | 7.7542(7)                                        | 10.7005(3)                                                     |
| $b/\text{Å}$                              | 12.7074(9)                                       | 15.6464(5)                                                     |
| $c/\text{Å}$                              | 17.2355(15)                                      | 19.4063(7)                                                     |
| $\beta/^\circ$                            | 102.159(9) <sup>o</sup>                          |                                                                |
| Volume/Å <sup>3</sup>                     | 1660.2(2)                                        | 3249.09(18)                                                    |
| $Z$                                       | 4                                                | 4                                                              |
| Temp./K                                   | 123(2)                                           | 123(2)                                                         |
| Refls. Collect.                           | 17768                                            | 22031                                                          |
| $2\theta_{\text{max}}$                    | 52.0                                             | 146.3                                                          |
| $R_{\text{int}}$                          | 0.0711                                           | 0.0369                                                         |
| Refls. Unique                             | 3275                                             | 3254                                                           |
| Refls. Obs.                               | 2186                                             | 2483                                                           |
| Goodness of fit                           | 1.074                                            | 1.079                                                          |
| $R[F^2 > 2\sigma], F$                     | 0.0604                                           | 0.0527                                                         |
| $R_w$ (all data), $F^2$                   | 0.1295                                           | 0.1560                                                         |
| Largest diff. peak/hole/e Å <sup>-3</sup> | 0.198/-0.175                                     | 0.309/-0.201                                                   |

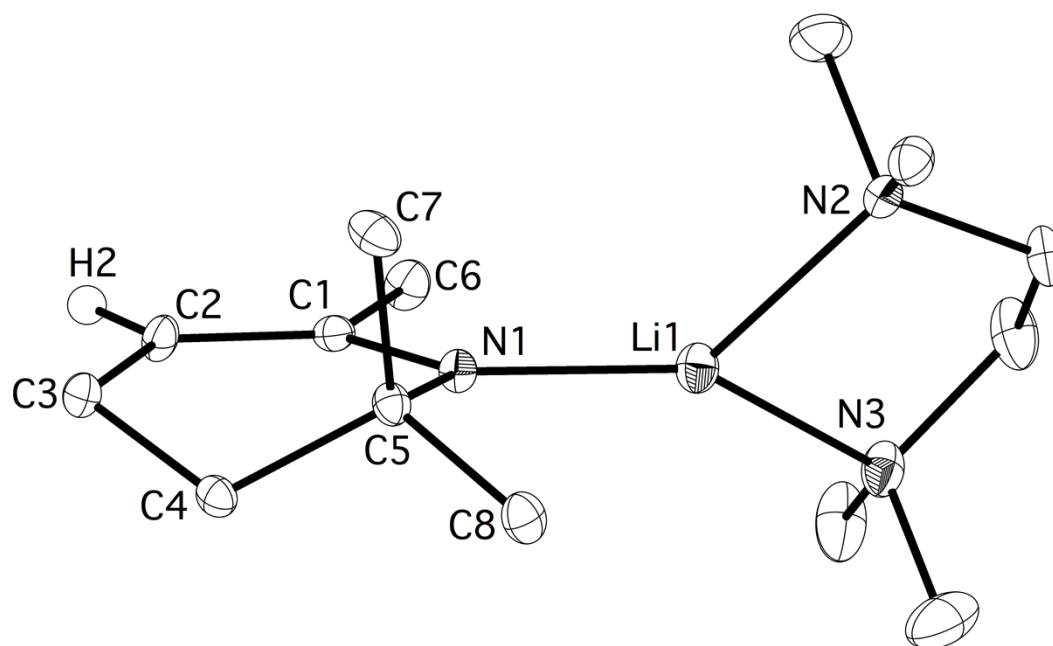

**Figure S1.** Molecular structure of **1·TMEDA**. Hydrogen atoms omitted for clarity with exception of the olefinic hydrogen on C2. Thermal ellipsoids are displayed at 30% probability.

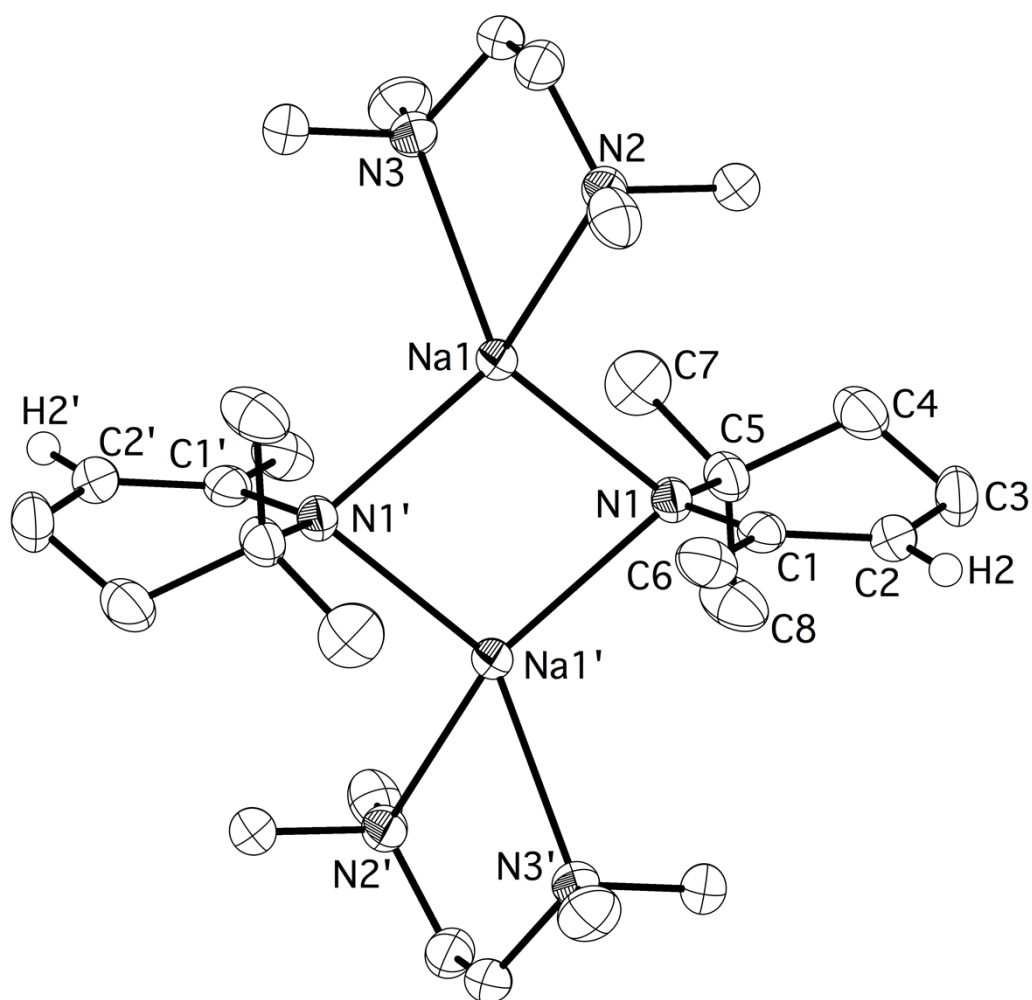

**Figure S2.** Molecular structure of **2·TMEDA**. Hydrogen atoms omitted for simplicity with exception of the olefinic hydrogen on C2. Thermal ellipsoids are displayed at 35% probability.

**Table S2.** Selected bond lengths (Å) and angles (°) for **1·TMEDA** and **2·TMEDA**.

|                |            |                   |            |
|----------------|------------|-------------------|------------|
| <b>1·TMEDA</b> |            |                   |            |
| Li(1)-N(1)     | 1.883(4)   |                   |            |
| Li(1)-N(3)     | 2.077(4)   | N(1)-Li(1)-N(3)   | 141.48(18) |
| Li(1)-N(2)     | 2.078(3)   | N(3)-Li(1)-N(2)   | 87.95(14)  |
| N(1)-C(1)      | 1.363(2)   | C(1)-N(1)-C(5)    | 114.44(15) |
| N(1)-C(5)      | 1.469(2)   | C(2)-C(1)-N(1)    | 127.35(17) |
| C(1)-C(2)      | 1.357(3)   | C(2)-C(1)-C(6)    | 119.49(16) |
| C(4)-C(5)      | 1.533(2)   | N(1)-C(1)-C(6)    | 113.15(16) |
| <b>2·TMEDA</b> |            |                   |            |
| Na(1)-N(1)     | 2.4338(17) |                   |            |
| Na(1)-N(1)'    | 2.4835(16) | N(2)-Na(1)-N(3)   | 71.97(5)   |
| Na(1)-N(2)     | 2.5262(17) | C(1)-N(1)-C(6)    | 113.71(17) |
| Na(1)-N(3)     | 2.5924(17) | N(1)-C(1)-C(2)    | 127.5(2)   |
| N(1)-C(1)      | 1.356(2)   | C(2)-C(1)-C(3)    | 118.0(2)   |
| N(1)-C(6)      | 1.475(2)   | C(1)-C(2)-C(4)    | 121.4(2)   |
| C(1)-C(2)      | 1.370(3)   | N(1)-Na(1)-N(1)'  | 100.90(5)  |
| C(5)-C(6)      | 1.536(3)   | Na(1)-N(1)-Na(1)' | 79.10(5)   |

The symmetry operation to generate the equivalent atoms labelled with ' is -x,-y,-z+2.

## NMR Spectra

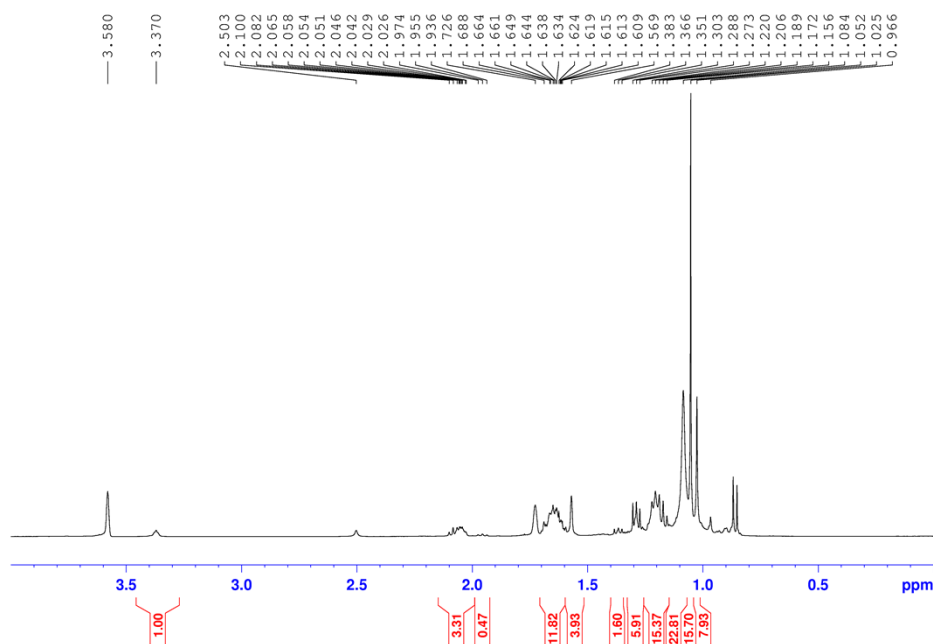

**Figure S3.**  $^1\text{H}$  NMR Spectrum ( $d_8$ -THF, 300K, 400.1 MHz) of aliquot of reaction mixture in the absence of TMEDA after 18 h under reflux conditions in methylcyclohexane showing partial conversion of LiTMP to LiTTHP (**1**, 25% approx.). Conversion estimated as the ratio of signals of TTHP to LiTMP and TMPH (present from hydrolysis of LiTMP in  $d_8$ -THF).

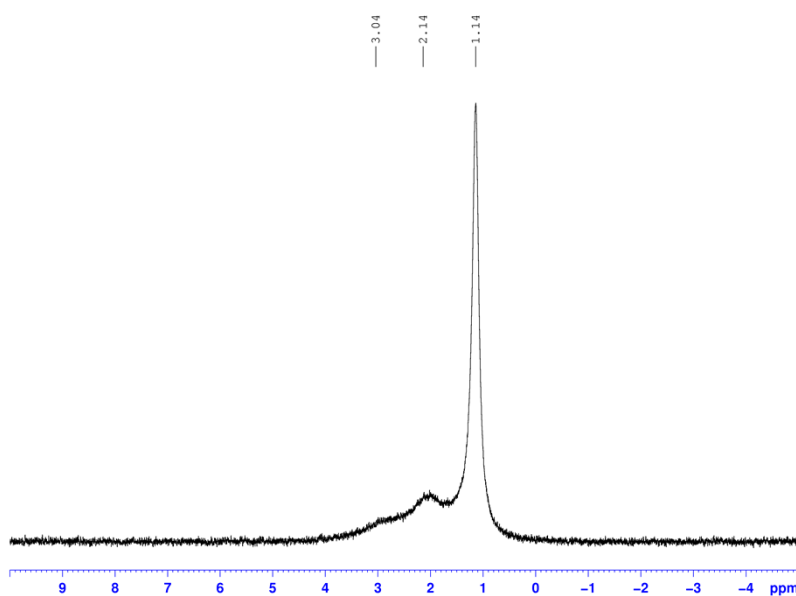

**Figure S4.**  $^7\text{Li}$  NMR Spectrum ( $d_8$ -THF, 300K, 155.5 MHz) of aliquot of reaction mixture in the absence of TMEDA after 18 h under reflux conditions in methylcyclohexane showing partial conversion of LiTMP to LiTTHP (**1**, 25% approx., estimated by  $^1\text{H}$  NMR study).

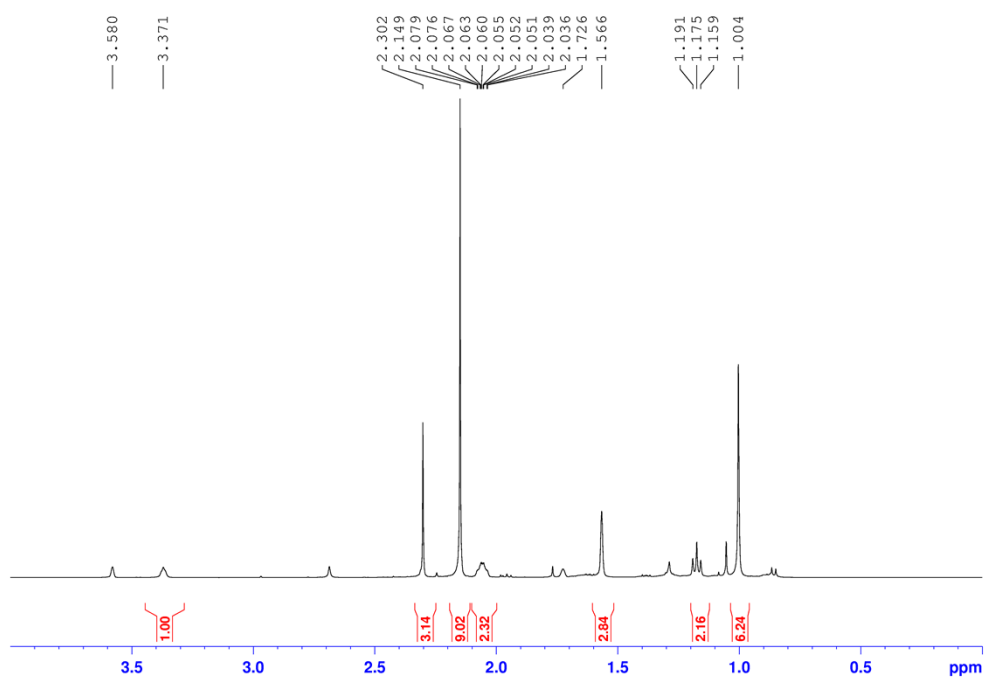

**Figure S5.**  $^1\text{H}$  NMR Spectrum ( $d_8$ -THF, 300K, 400.1 MHz) of aliquot of reaction mixture showing quantitative conversion of TMEDA·LiTMP to TMEDA·Li(TTHP) (**1·TMEDA**).

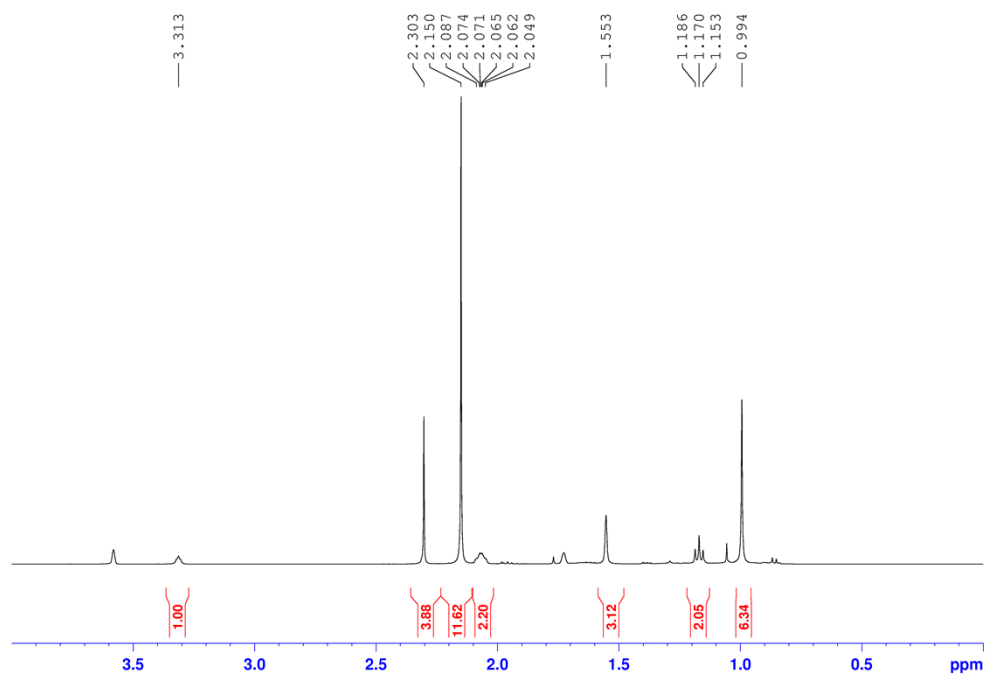

**Figure S6.**  $^1\text{H}$  NMR spectrum ( $d_8$ -THF, 300K, 400.1 MHz) of isolated crystals of [TMEDA·Li(TTHP)] (**1·TMEDA**).



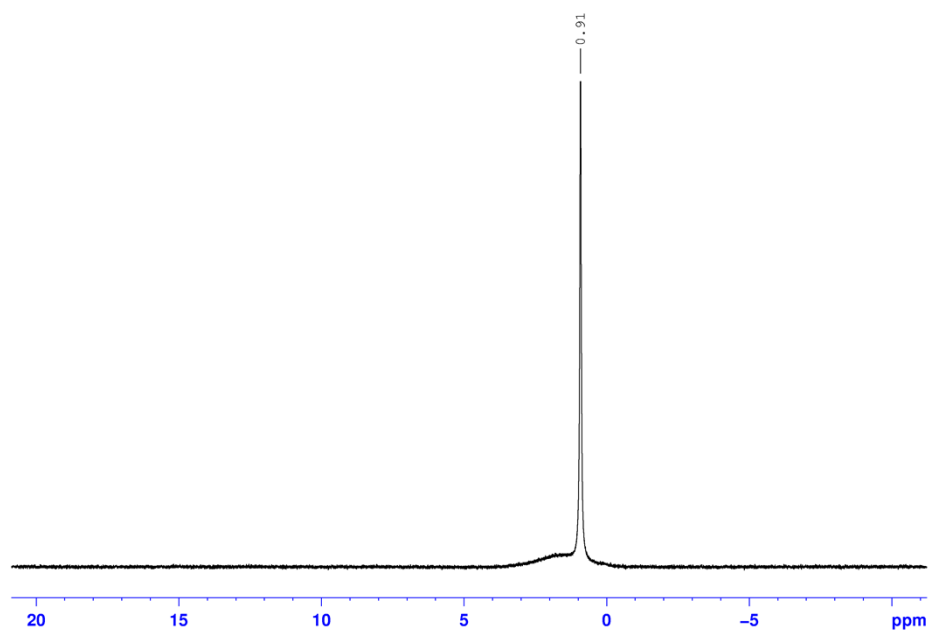

**Figure S7.**  ${}^7\text{Li}$  NMR Spectrum ( $d_8$ -THF, 300K, 155.5 MHz) of isolated crystals of [TMEDA·Li(TTHP)] (**1·TMEDA**).

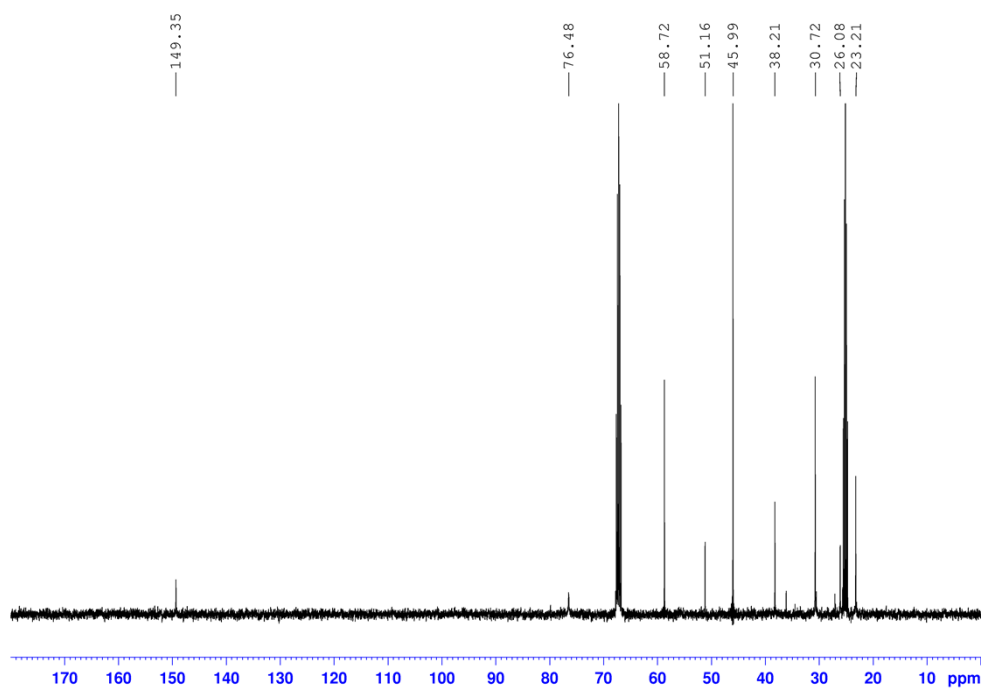

**Figure S8.**  ${}^{13}\text{C}$  NMR Spectrum ( $d_8$ -THF, 300K, 100.60 MHz) of isolated crystals of [TMEDA·Li(TTHP)] (**1·TMEDA**).

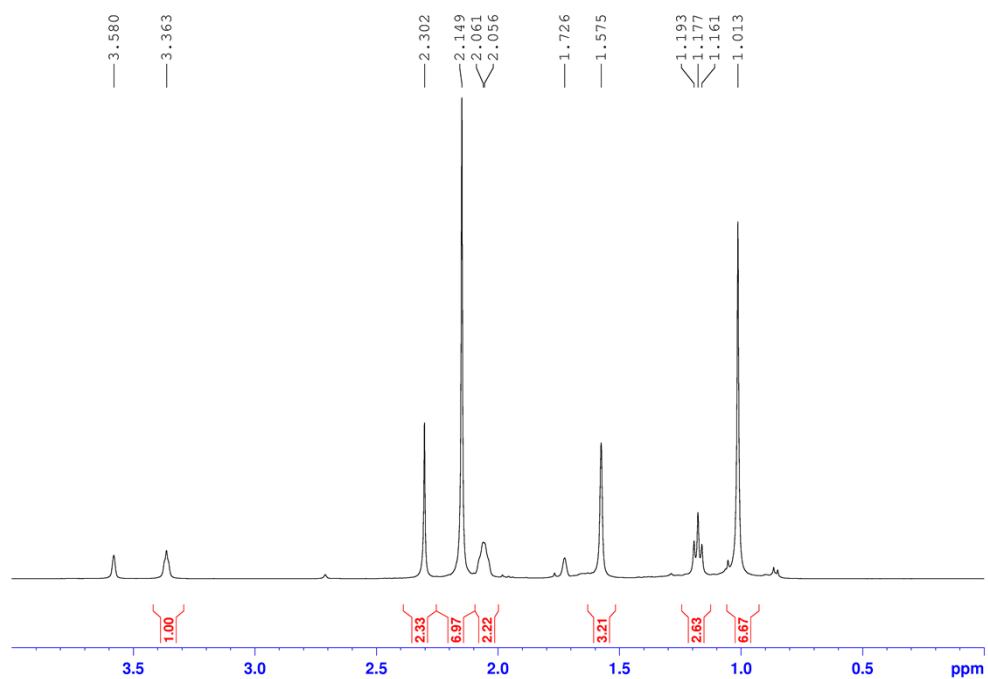

**Figure S9.**  $^1\text{H}$  NMR Spectrum ( $d_8$ -THF, 300K, 400.1 MHz) of oil formed in reaction mixture of  $[\text{TMEDA}\cdot\text{Li}(\text{TTHP})]$  (**1·TMEDA**).

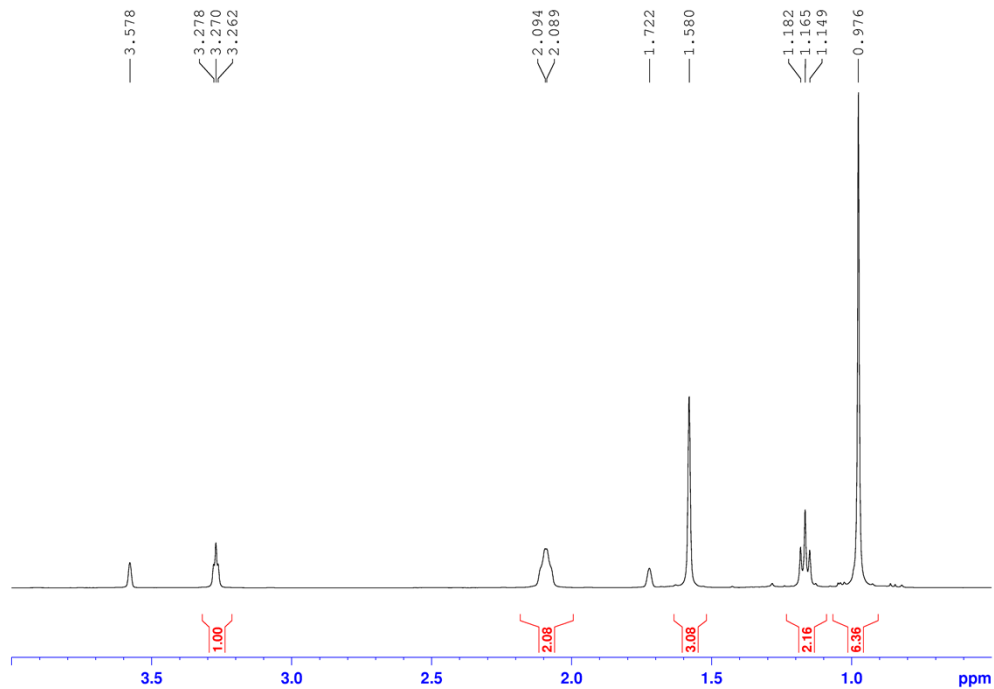

**Figure S10.**  $^1\text{H}$  NMR spectrum ( $d_8$ -THF, 300K, 400.1 MHz) of isolated NaTTHP (**2**).

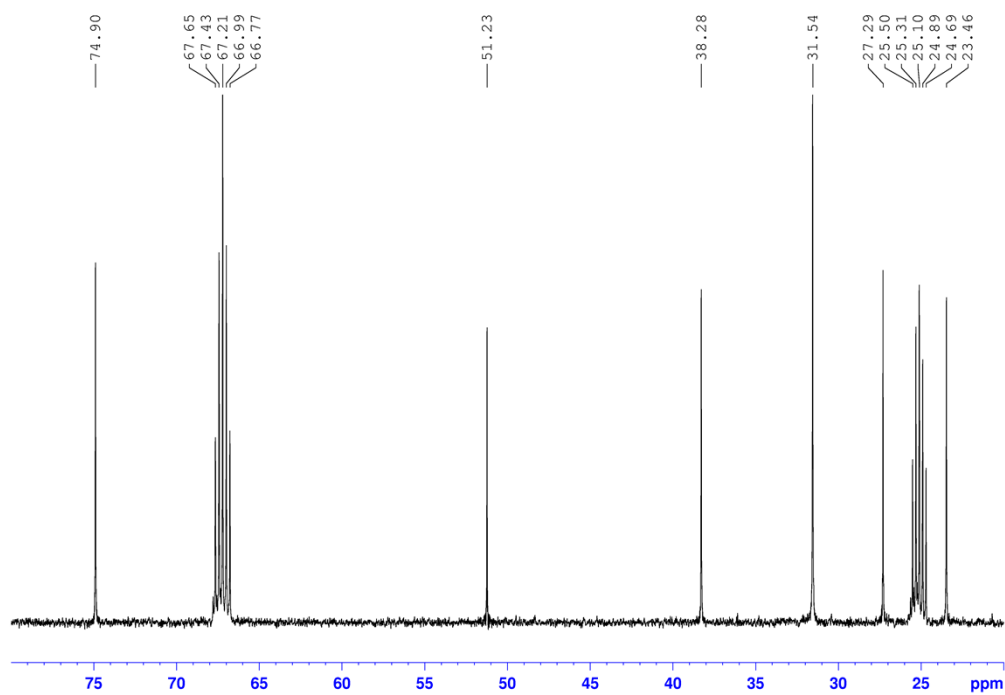

**Figure S11.**  $^{13}\text{C}$  NMR Spectrum ( $d_8$ -THF, 300K, 100.60 MHz) of isolated NaTTHP (2).

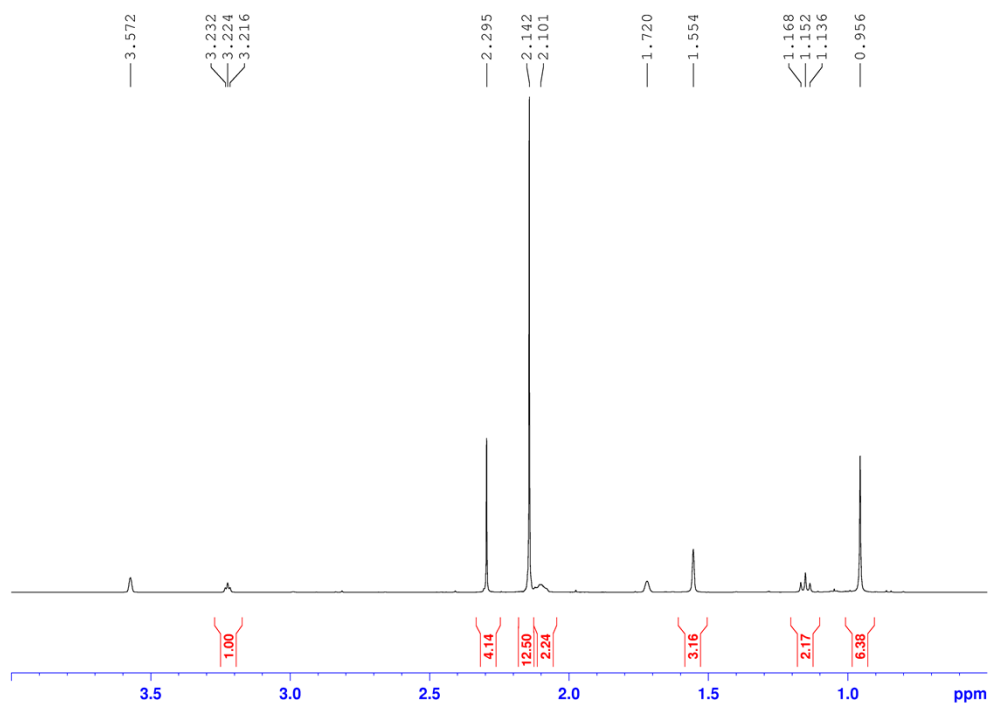

**Figure S12.**  $^1\text{H}$  NMR spectrum ( $d_8$ -THF, 300K, 400.1 MHz) of isolated crystals of [TMEDA·Na(TTHP)] (2·TMEDA).

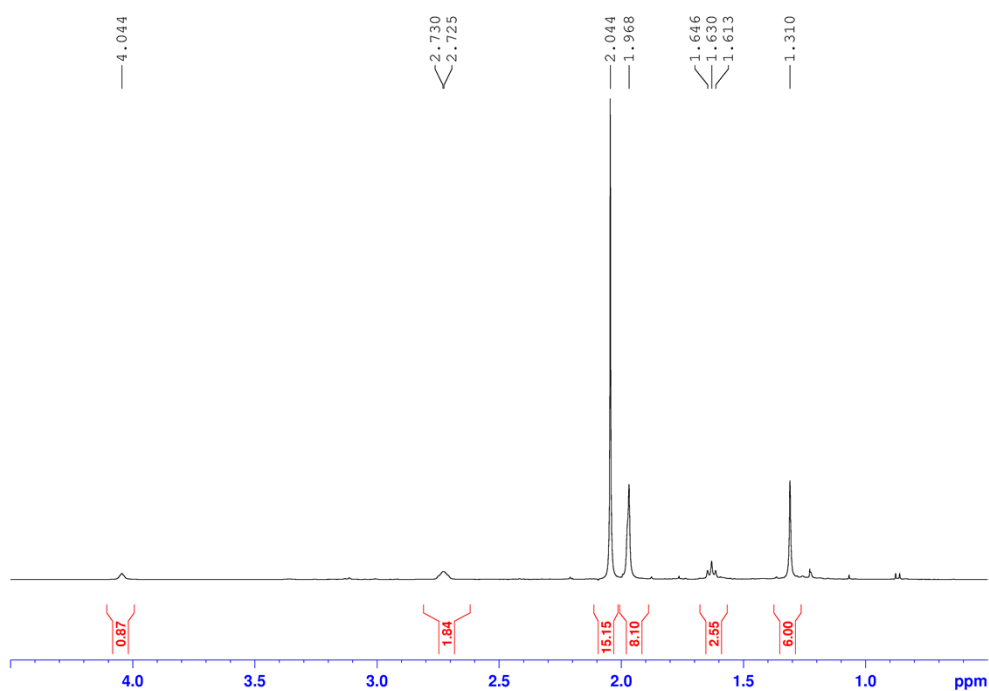

**Figure S13.** <sup>1</sup>H NMR spectrum (C<sub>6</sub>D<sub>6</sub>, 300K, 400.1 MHz) of isolated crystals of [TMEDA·Na(TTHP)] (2·TMEDA).

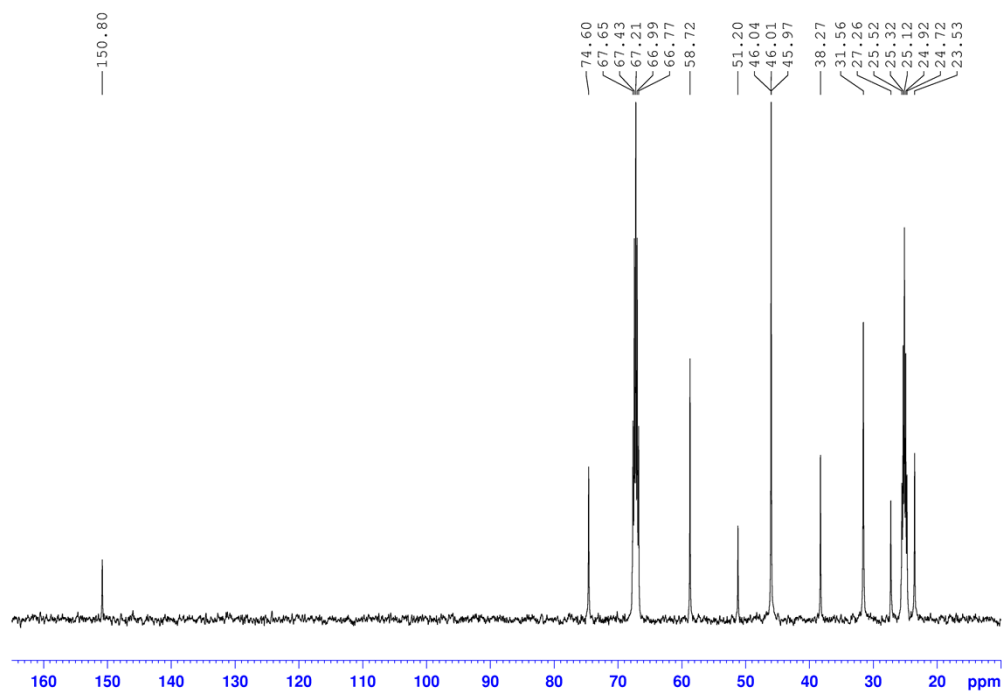

**Figure S14.** <sup>13</sup>C NMR Spectrum (*d*<sub>8</sub>-THF, 300K, 100.60 MHz) of isolated crystals of [TMEDA·Na(TTHP)] (2·TMEDA).

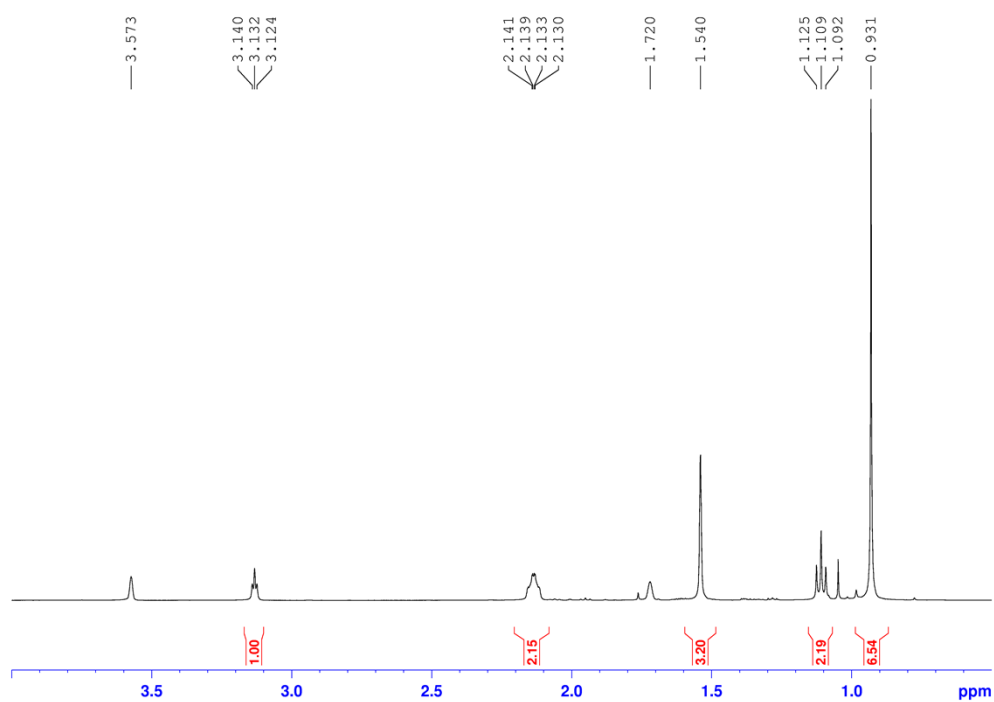

**Figure S15.** <sup>1</sup>H NMR spectrum (d<sub>8</sub>-THF, 300K, 400.1 MHz) of KTTHP (3).

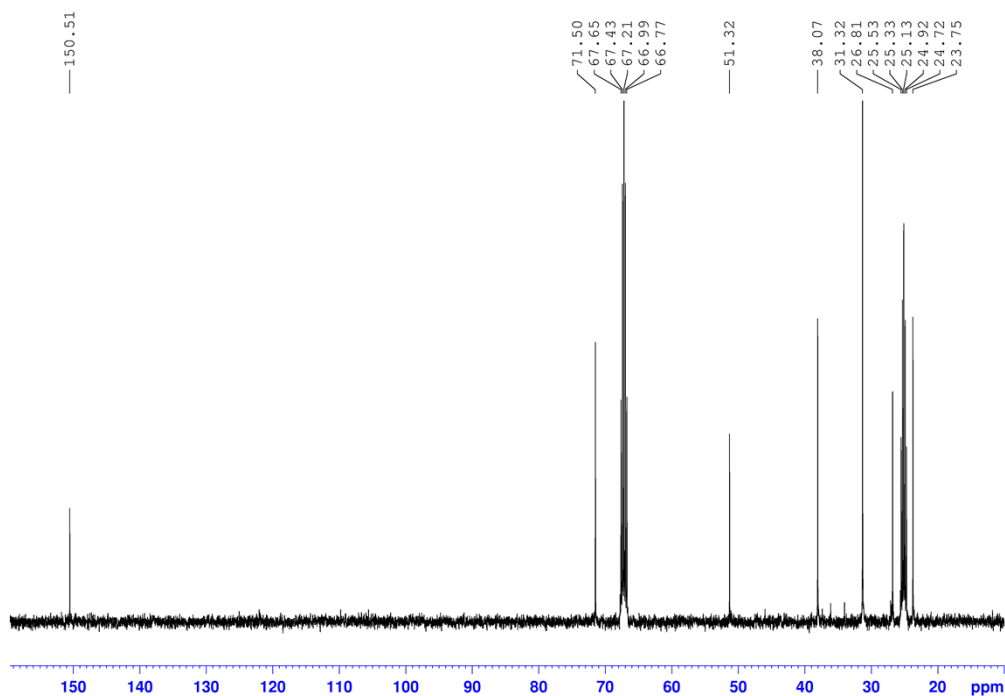

**Figure S16.** <sup>13</sup>C NMR Spectrum (d<sub>8</sub>-THF, 300K, 100.60 MHz) of isolated KTTHP (3).

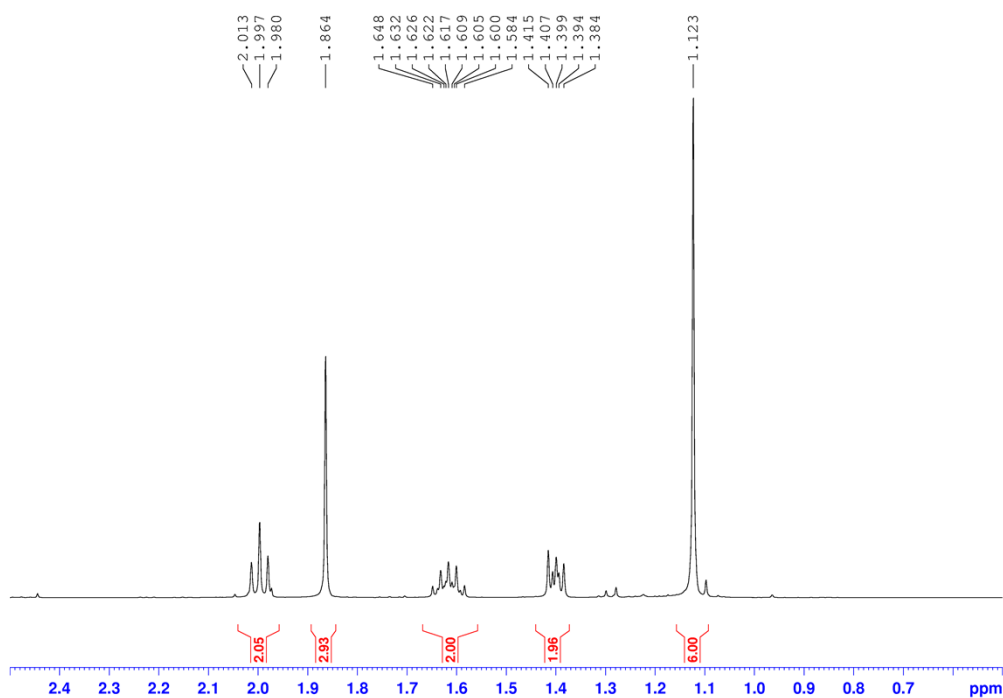

**Figure S17.**  $^1\text{H}$  NMR spectrum ( $\text{CDCl}_3$ , 300K, 400.1 MHz) of 2,2,6-trimethyl-2,3,4,5-tetrahydropyridine (**4**).

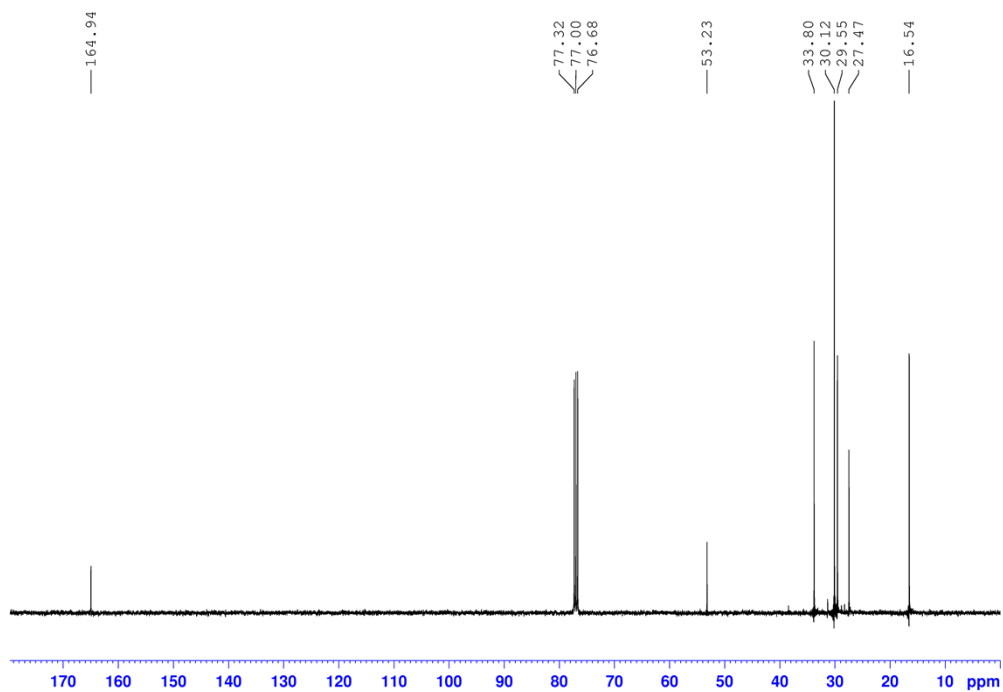

**Figure S18.**  $^{13}\text{C}$  NMR Spectrum ( $\text{CDCl}_3$ , 300K, 100.60 MHz) of 2,2,6-trimethyl-2,3,4,5-tetrahydropyridine (**4**).

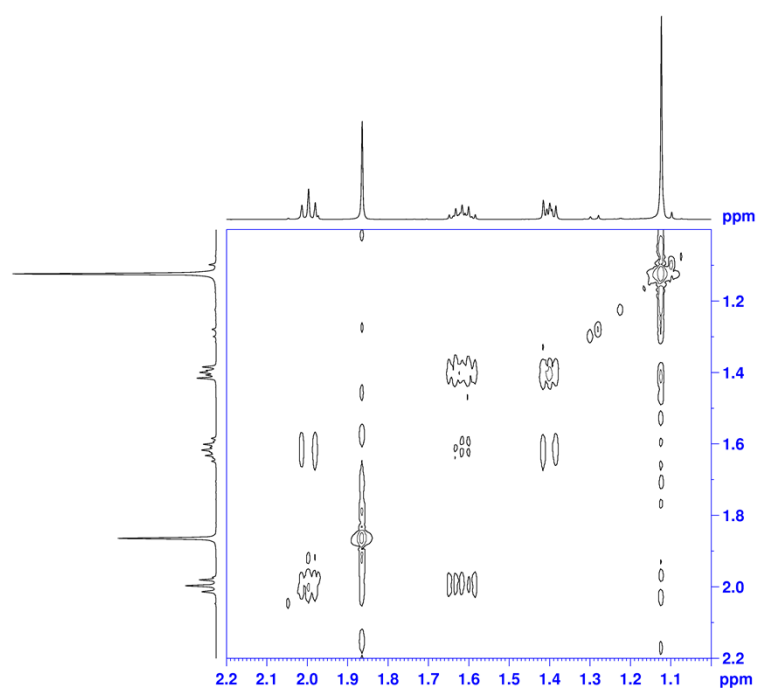

**Figure S19.**  $^1\text{H}, ^1\text{H}$ -COSY NMR Spectrum ( $\text{CDCl}_3$ , 300K, 100.60 MHz) of 2,2,6-trimethyl-2,3,4,5-tetrahydropyridine (**4**).

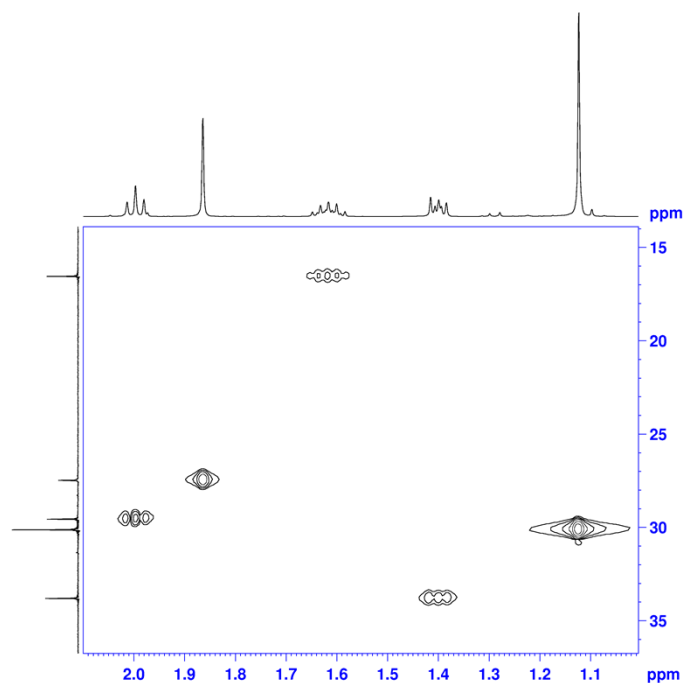

**Figure S20.**  $^1\text{H}, ^{13}\text{C}$ -HSQC NMR Spectrum ( $\text{CDCl}_3$ , 300K, 100.60 MHz) of 2,2,6-trimethyl-2,3,4,5-tetrahydropyridine (**4**).

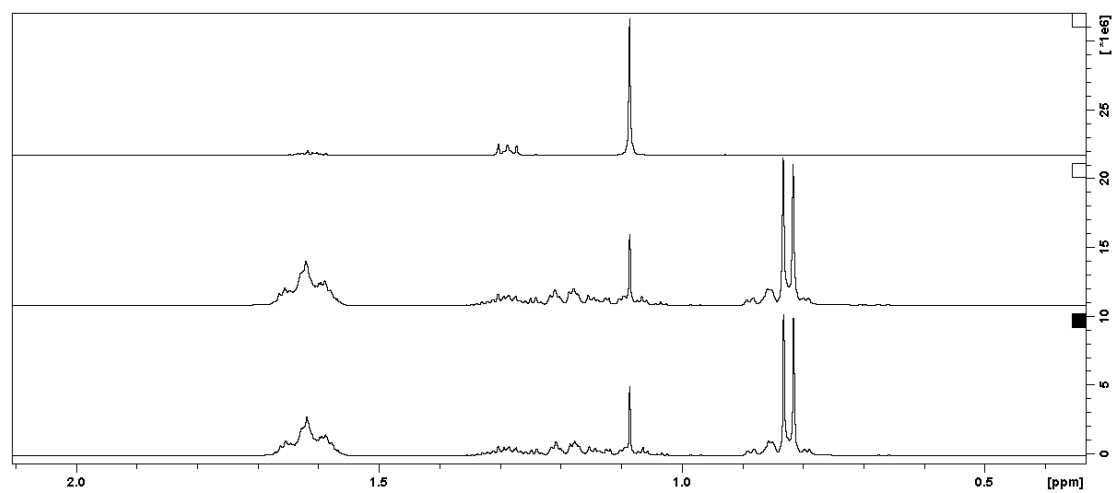

**Figure S21.**  $^1\text{H}$  NMR study ( $\text{CDCl}_3$ , 300K, 400.1 MHz) of a control reaction in the absence of alkali metal. TMP(H) (top), *in situ* reaction mixture from TMP(H) and methylcyclohexane before (middle) and after 24 h at 101 °C (bottom).



## **<sup>1</sup>H DOSY NMR Studies**

**<sup>1</sup>H DOSY NMR Analysis Details.** The Diffusion-Ordered Spectroscopy (DOSY) NMR experiments were performed on a Bruker AVANCE 400 MHz NMR spectrometer at 300 K operating at 400.1 MHz for <sup>1</sup>H under TopSpin (version 2.0, Bruker Biospin, Karlsruhe) and equipped with a BBFO-z-atm probe with actively shielded z-gradient coil capable of delivering a maximum gradient strength of 54 G cm<sup>-1</sup>. Diffusion-ordered NMR data were acquired using the Bruker pulse program *dsteqp3s* with a double stimulated echo with three spoiling gradients. Sine-shaped gradient pulses were used with a duration of 4 ms together with a diffusion period of 100 ms. Gradient recovery delays of 200 μs followed the application of each gradient pulse. Data were systematically accumulated by linearly varying the diffusion encoding gradients over a range from 2% to 95% of maximum for 64 gradient increment values. The signal decay dimension on the *pseudo*-2D data was generated by Fourier transformation of the time-domain data. DOSY plots were generated by use of the DOSY processing module of TopSpin. Parameters were optimized empirically to find the best quality of data for presentation purposes. Diffusion coefficients were calculated by fitting intensity data to the Stejskal-Tanner expression. From the diffusion coefficients of the internal standards used (1,2,3,4-tetraphenylnaphthalene, 1-phenylnaphthalene and tetramethylsilane), linear calibration graphs were obtained by plotting *logD* versus *logMW*. Using the diffusion coefficients for the signals corresponding to the corresponding compound, an estimate of the MW of the species present in solution was obtained.

**DOSY NMR Samples Preparation.** To an NMR tube containing the corresponding compound to be analysed (typically, 20 mg) dissolved in the appropriate deuterated solvent (C<sub>6</sub>D<sub>6</sub> or *d*<sub>8</sub>-THF, 0.5 mL) was added inert internal standards 1,2,3,4-tetraphenylnaphthalene (TPhN, 15 mg), 1-phenylnaphthalene (PhN, 13.2 μL) and tetramethylsilane (TMS, 19.1 μL).

**<sup>1</sup>H DOSY NMR study of compound 1·TMEDA in C<sub>6</sub>D<sub>6</sub> solution.**

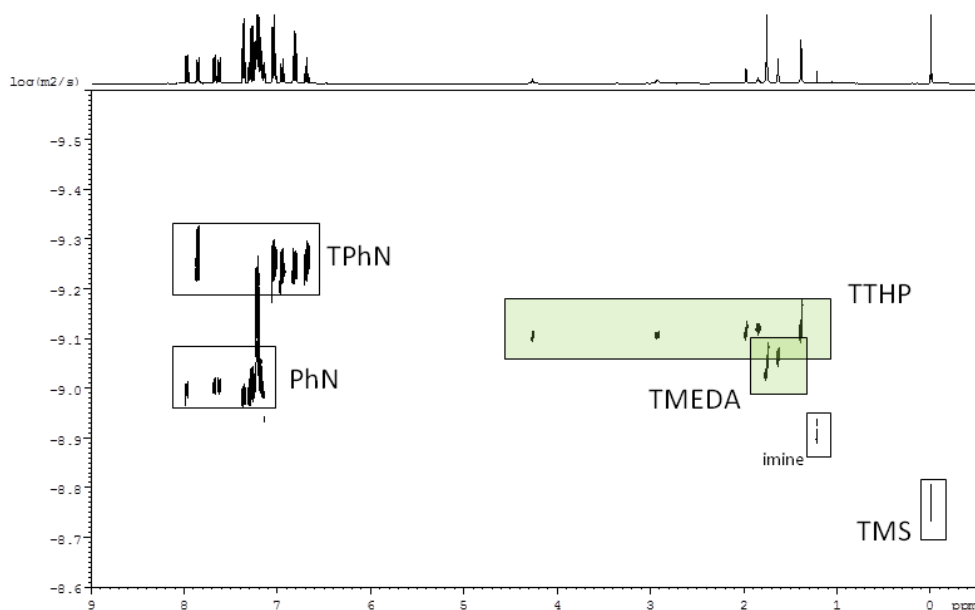

**Figure S22.** <sup>1</sup>H DOSY NMR plot of **1·TMEDA** in C<sub>6</sub>D<sub>6</sub> solution. Small signals of 2,2,6-trimethyl-2,3,4,5-tetrahydropyridine (**4**) due to unavoidable hydrolysis of **1·TMEDA** are detected (MW<sub>DOSY</sub> found for **4**, 140.8 g mol<sup>-1</sup>; calc. 125.21 g mol<sup>-1</sup>, error 11.1%).

From the D values obtained for the internal standards a linear calibration graph of LogD versus LogMW was obtained (Figure S21), with formula  $\log D = -0.681(\log MW) - 7.4378$ . Using the D values for **1·TMEDA** and the calibration graph, the MW of species in solution were estimated (Table S4).

**Table S3.** Diffusion coefficients and MW of internal standards.

| Standard | MW (gmol <sup>-1</sup> ) | logMW | D (m <sup>2</sup> s <sup>-1</sup> ) | logD   |
|----------|--------------------------|-------|-------------------------------------|--------|
| TPhN     | 432.55                   | 2.636 | 5.74E-10                            | -9.241 |
| PhN      | 204.27                   | 2.310 | 1.01E-9                             | -8.996 |
| TMS      | 88.22                    | 1.946 | 1.70E-9                             | -8.770 |

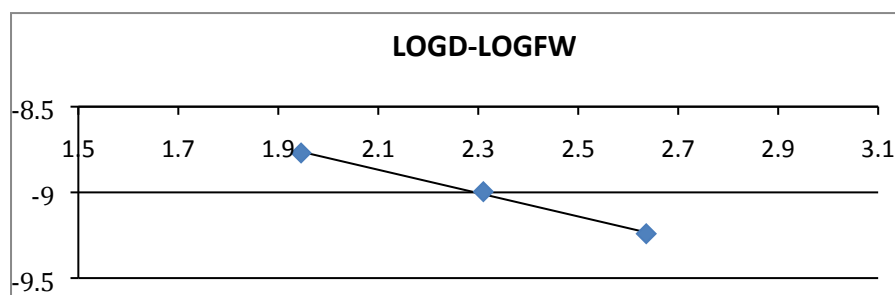

**Figure S23.** Calibration graph ( $\log D = -0.681(\log MW) - 7.4378$ ,  $R^2 = 0.997$ ) used to estimate of MW of compound **1-TMEDA** in  $C_6D_6$  solution.

**Table S4.** Diffusion coefficients and corresponding calculated  $MW_{DOSY}$  for components present in  $C_6D_6$  solution.

| Component of spectrum                                   | D ( $m^2 s^{-1}$ ) | $MW_{DOSY}^a$ ( $g mol^{-1}$ ) |
|---------------------------------------------------------|--------------------|--------------------------------|
| LiTTHP ( <b>1</b> )                                     | 7.75E-10           | 286.1                          |
| TMEDA                                                   | 8.74E-10           | 239.8                          |
| 2,2,6-trimethyl-2,3,4,5-tetrahydropyridine ( <b>4</b> ) | 1.26E-9            | 140.8                          |

<sup>a</sup> MW from [ $\log D = -0.681 \cdot \log MW - 7.4378$  ( $r^2 = 0.997$ )]

From the DOSY NMR study in  $C_6D_6$  solution, the different components of the mixture are separated in the diffusion dimension in the size sequence TPhN > TTHP > TMEDA > PhN > TMS according to their increasing D values in the order TPhN < TTHP < TMEDA < PhN < TMS (see Tables S3 and S4).

The  $MW_{DOSY}$  values obtained were compared to the true MW of various species which may be present in the solution. The error of the  $MW_{DOSY}$  values with respect to these species was also determined. The results are shown in Table S5.

**Table S5.** Comparison of  $MW_{DOSY}$  to the MW of possible species.

| Possible Species | MW <sup>a</sup><br>( $g mol^{-1}$ ) | ( $g mol^{-1}$ ) $MW_{DOSY}^b$ | ( $g mol^{-1}$ ) Error<br>$MW_{DOSY}$ | (%) in |
|------------------|-------------------------------------|--------------------------------|---------------------------------------|--------|
|------------------|-------------------------------------|--------------------------------|---------------------------------------|--------|

|                                             |        |       |        |
|---------------------------------------------|--------|-------|--------|
| TMEDA·LiTTHP<br>( <b>1</b> · <b>TMEDA</b> ) | 247.35 | 286.1 | +13.54 |
| LiTTHP ( <b>1</b> )                         | 131.15 | 286.1 | +54.16 |
| TMEDA                                       | 116.2  | 239.8 | +51.54 |

---

<sup>a</sup> Real MW, <sup>b</sup> MW from [ $\log D = -0.681 \cdot \log MW - 7.4378$  ( $r^2 = 0.997$ )]

As shown in Figure S20 and Table S4, the D value of the TMEDA in **1**·**TMEDA** ( $8.74\text{E-}10 \text{ m}^2\text{s}^{-1}$ ) is smaller than that determined for the TTHP component of **1**·**TMEDA** ( $7.75\text{E-}10 \text{ m}^2\text{s}^{-1}$ ), and corresponds to a  $MW_{\text{DOSY}}$  for the TMEDA which lies intermediate between the MW of free TMEDA ( $116.2 \text{ g mol}^{-1}$ ) and unsolvated LiTTHP (**1**,  $131.15 \text{ g mol}^{-1}$ ). The data could be consistent with **1**·**TMEDA** existing in  $\text{C}_6\text{D}_6$  solution as some mixture of the TMEDA solvated species, an unsolvated  $[\text{LiTTHP}]_n$  and/or a species to which  $\text{C}_6\text{D}_6$  is coordinated.

The D value of the TTHP signals gives a  $MW_{\text{DOSY}}$  which is greater than the MW of **1**·**TMEDA** ( $MW \text{ } 247.35 \text{ g mol}^{-1}$ ;  $MW_{\text{DOSY}} \text{ } 286.1 \text{ g mol}^{-1}$ ; error +13.5%), which could also be consistent with an equilibrium between TMEDA solvated **1**·**TMEDA** and a higher MW unsolvated or  $\text{C}_6\text{D}_6$  solvated LiTTHP species.

**<sup>1</sup>H DOSY NMR study of compound 1·TMEDA in d<sub>8</sub>-THF solution.**

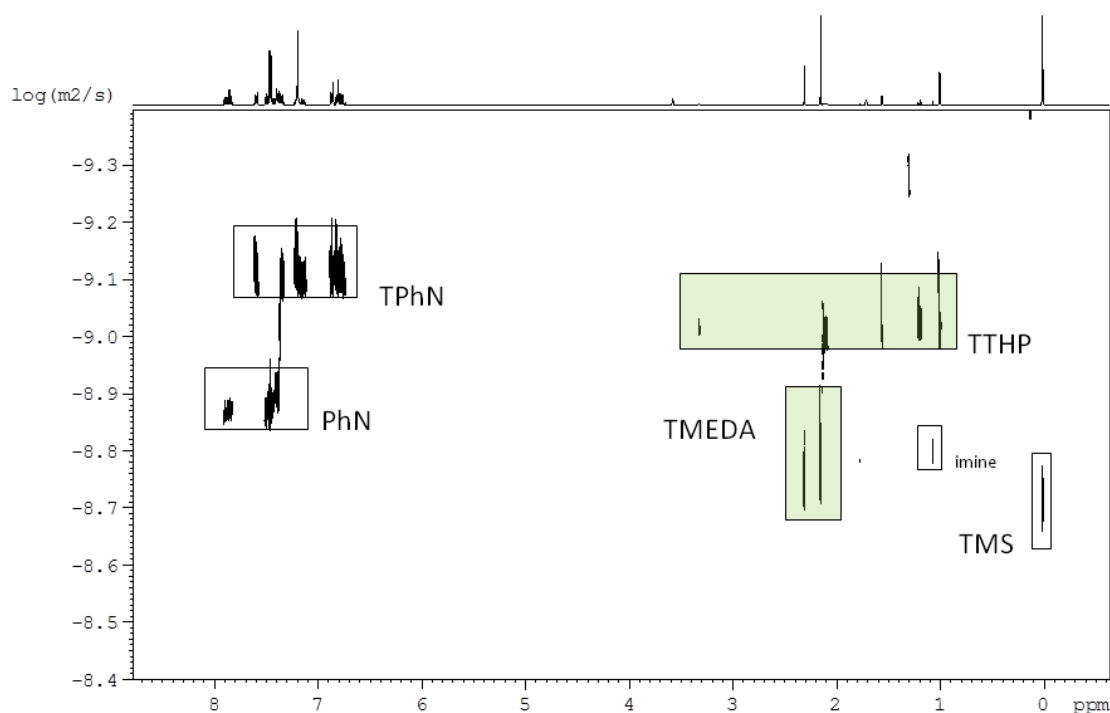

**Figure S24.** DOSY NMR plot of **1·TMEDA** in *d*<sub>8</sub>-THF solution. Small signals of imine **4** due to unavoidable hydrolysis of **1·TMEDA** are detected ( $MW_{\text{DOSY}}$  found for imine **4**, 134.10 g mol<sup>-1</sup>; calc. 125.21 g mol<sup>-1</sup>, error 6.6%).

From the *D* values obtained for the internal standards (Table S6) a linear calibration graph of Log*D* versus Log*MW* was obtained (Figure S25), with formula  $\log D = -0.5687(\log MW) - 7.5763$ . Using the *D* values for **1·TMEDA** and the calibration graph,  $MW_{\text{DOSY}}$  was determined (Table S7).

**Table S6.** Diffusion coefficients and *MW* of internal standards.

| Standard    | <i>MW</i> (g mol <sup>-1</sup> ) | log <i>MW</i> | <i>D</i> (m <sup>2</sup> s <sup>-1</sup> ) | log <i>D</i> |
|-------------|----------------------------------|---------------|--------------------------------------------|--------------|
| <b>TPhN</b> | 432.55                           | 2.636         | 8.14E-10                                   | -9.089       |
| <b>PhN</b>  | 204.27                           | 2.310         | 1.37E-9                                    | -8.864       |
| <b>TMS</b>  | 88.22                            | 1.946         | 2.02E-9                                    | -8.695       |

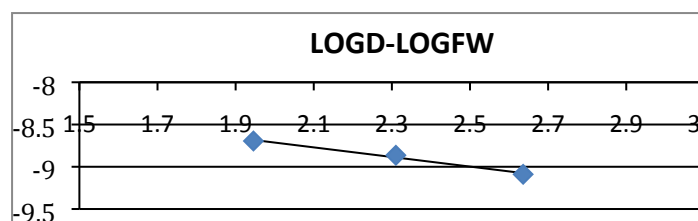

**Figure S25.** Calibration graph ( $\log D = -0.5687(\log MW) - 7.5763$ ,  $R^2 = 0.987$ ) used to estimate MW of compound **1·TMEDA** in  $d_8$ -THF solution.

**Table S7.** Diffusion coefficients and corresponding calculated  $MW_{\text{DOSY}}$  for components present in  $d_8$ -THF solution.

| Component of spectrum | D ( $\text{m}^2 \text{s}^{-1}$ ) | $MW_{\text{DOSY}}^a$ ( $\text{g mol}^{-1}$ ) |
|-----------------------|----------------------------------|----------------------------------------------|
| LiTTHP ( <b>1</b> )   | 9.95E-10                         | 321.84                                       |
| TMEDA                 | 1.85E-9                          | 108.20                                       |

<sup>a</sup> MW from [ $\log D = -0.5687 \cdot \log MW - 7.5763$  ( $r^2 = 0.987$ )]

From the DOSY NMR study in  $d_8$ -THF solution, the different components of the mixture are separated in the diffusion dimension in the size sequence TPhN > TTHP > PhN > TMEDA > TMS according to their increasing D values in the order TPhN < TTHP < PhN < TMEDA < TMS (see Tables S6 and S7).

The  $MW_{\text{DOSY}}$  values obtained were compared to the true MW of various species which may be present in the solution. The error of the  $MW_{\text{DOSY}}$  values with respect to these species was also determined. The results are shown in Table S8.

**Table S8.** Comparison of  $W_{\text{DOSY}}$  to the MW of possible species.

| Possible Species                   | MW <sup>a</sup> | $MW_{\text{DOSY}}^b$ ( $\text{gmol}^{-1}$ ) | Error (%) in $MW_{\text{DOSY}}$ |
|------------------------------------|-----------------|---------------------------------------------|---------------------------------|
| TMEDA·LiTTHP<br>( <b>1·TMEDA</b> ) | 247.35          | 321.84                                      | +23.15                          |
| LiTTHP ( <b>1</b> )                | 131.15          | 321.84                                      | -88.60                          |

|                                            |       |        |        |
|--------------------------------------------|-------|--------|--------|
| $[\text{LiTTHP} \cdot (d_8\text{-THF})]_2$ | 422.8 | 321.84 | -31.37 |
| $[\text{LiTTHP}]_2 \cdot (d_8\text{-THF})$ | 342.5 | 321.84 | -6.42  |
| $\text{LiTTHP} \cdot (d_8\text{-THF})_2$   | 291.5 | 321.84 | 9.43   |
| TMEDA                                      | 116.2 | 108.16 | -7.43  |

---

<sup>a</sup> Real MW, <sup>b</sup> MW from  $[\log D = -0.5687 \cdot \log MW - 7.5763 \text{ (} r^2 = 0.987 \text{)}]$

The DOSY NMR data would be consistent with TMEDA being free in  $d_8$ -THF solution as the  $\text{MW}_{\text{DOSY}}$  obtained from the D value of the TMEDA signals using the calibration graph (Figure S25) is comparable to the true MW of free TMEDA (with error of -7.4%).

It is possible the LiTTHP is solvated instead by  $d_8$ -THF molecules, present in vast excess, rather than TMEDA. The D values observed for the LiTTHP signals give a  $\text{MW}_{\text{DOSY}}$  value of 321.84  $\text{g mol}^{-1}$ . Comparison of this value to the true MW of various possible  $d_8$ -THF solvated LiTTHP species was made (see Table S8).

The species for which  $\text{MW}_{\text{DOSY}}$  would have lowest error is the hemisolvate  $[(\text{LiTTHP})_2] \cdot (d_8\text{-THF})$  (MW 342.5  $\text{g mol}^{-1}$ ; error -6.4%). The  $\text{MW}_{\text{DOSY}}$  would have a similar error for a possible bis-solvated species  $\text{LiTTHP} \cdot (d_8\text{-THF})_2$  (MW 291.5  $\text{g mol}^{-1}$ ; error 9.4%).

**<sup>1</sup>H DOSY NMR study of compound Na·TTHP (2) in d<sub>8</sub>-THF solution.**

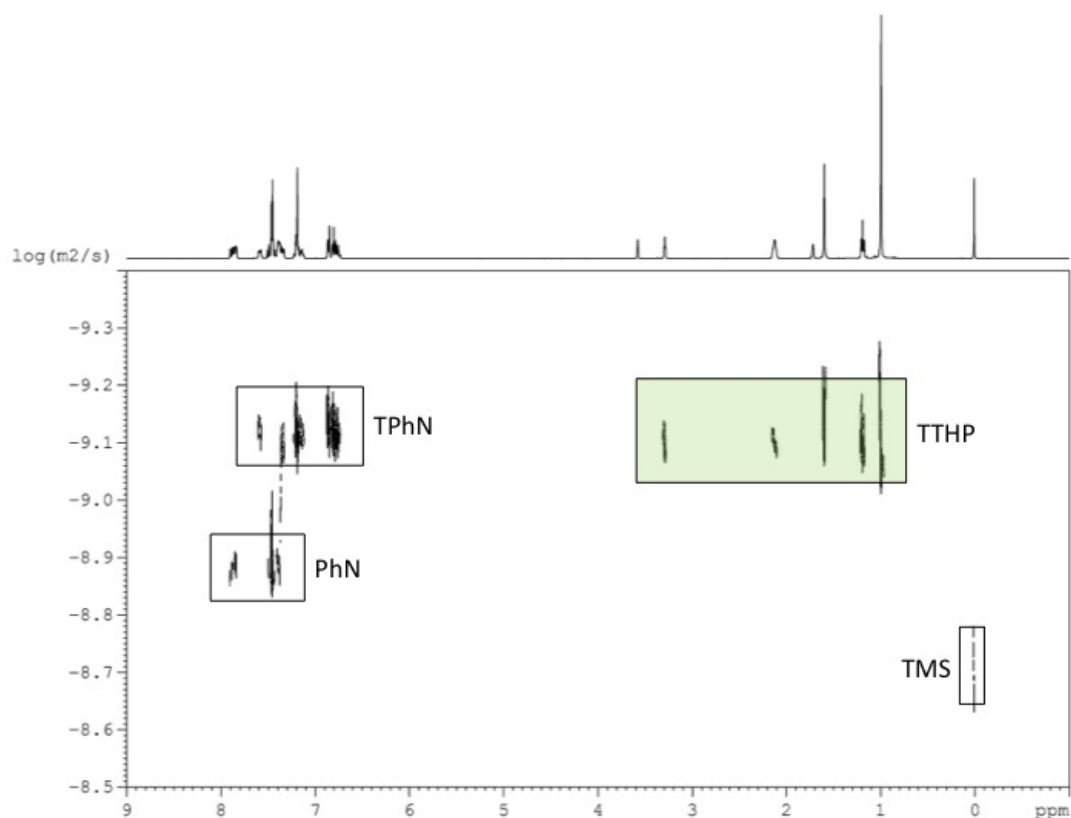

**Figure S26.** <sup>1</sup>H DOSY NMR plot of **2** in d<sub>8</sub>-THF solution.

From the D values obtained for the internal standards a linear calibration graph of LogD versus LogMW was obtained (Figure SX), with formula  $\log D = -0.6075 \cdot \log MW - 7.5061$  ( $r^2 = 0.993$ ). Using the D values for **2** and the calibration graph, the MW of species in solution were estimated (Table SX).

**Table S9.** Diffusion coefficients and MW of internal standards for **2**.

| Standard | MW (gmol <sup>-1</sup> ) | logMW | D (m <sup>2</sup> s <sup>-1</sup> ) | logD   |
|----------|--------------------------|-------|-------------------------------------|--------|
| TPhN     | 432.55                   | 2.636 | 7.61E-10                            | -9.119 |
| PhN      | 204.27                   | 2.310 | 1.29E-9                             | -8.889 |
| TMS      | 88.22                    | 1.946 | 2.01E-9                             | -8.698 |



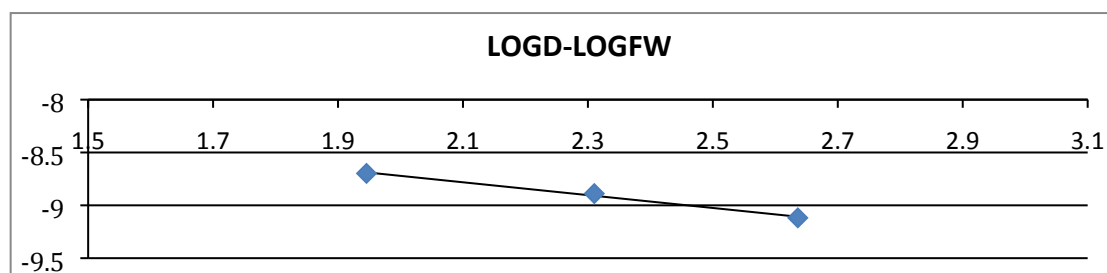

**Figure S27.** Calibration graph ( $\log D = -0.6075 \cdot \log MW - 7.5061$  ( $r^2 = 0.993$ )) used to estimate MW of compound **2** in  $d_8$ -THF solution.

**Table S10.** Diffusion coefficients and corresponding calculated  $MW_{\text{DOSY}}$  for components present in  $d_8$ -THF solution.

| Component of spectrum                                                               | D ( $\text{m}^2 \text{s}^{-1}$ ) | $MW_{\text{DOSY}}^a$ ( $\text{g mol}^{-1}$ ) |
|-------------------------------------------------------------------------------------|----------------------------------|----------------------------------------------|
| NaTTHP ( <b>2</b> )                                                                 | 7.91E-10                         | 423.2                                        |
| <sup>a</sup> MW from [ $\log D = -0.6075 \cdot \log MW - 7.5061$ ( $r^2 = 0.993$ )] |                                  |                                              |

The  $MW_{\text{DOSY}}$  values obtained were compared to the true MW of various species which may be present in the solution. The error of the  $MW_{\text{DOSY}}$  values with respect to these species was also determined. The results are shown in Table S11.

**Table S11.** Comparison of  $MW_{\text{DOSY}}$  to the MW of possible species.

| Possible Species                                                                                          | $MW^a$ ( $\text{g mol}^{-1}$ ) | $MW_{\text{DOSY}}^b$ ( $\text{g mol}^{-1}$ ) | Error (%) in $MW_{\text{DOSY}}$ |
|-----------------------------------------------------------------------------------------------------------|--------------------------------|----------------------------------------------|---------------------------------|
| $[\text{NaTTHP} \cdot (d_8\text{-THF})]_2$                                                                | 454.70                         | 423.20                                       | +7%                             |
| <sup>a</sup> Real MW, <sup>b</sup> MW from [ $\log D = -0.6075 \cdot \log MW - 7.5061$ ( $r^2 = 0.993$ )] |                                |                                              |                                 |

The D value of the TTHP signals gives a  $MW_{\text{DOSY}}$  which is comparable with the MW of  $[\text{NaTTHP} \cdot (d_8\text{-THF})]_2$  (error +7%), which could also be consistent with the presence of a dimeric  $[\text{NaTTHP}]_2$  solvated with two molecules of  $d_8$ -THF.

**<sup>1</sup>H DOSY NMR study of compound TMEDA·NaTTHP (2·TMEDA) in *d*<sub>8</sub>-THF solution.**

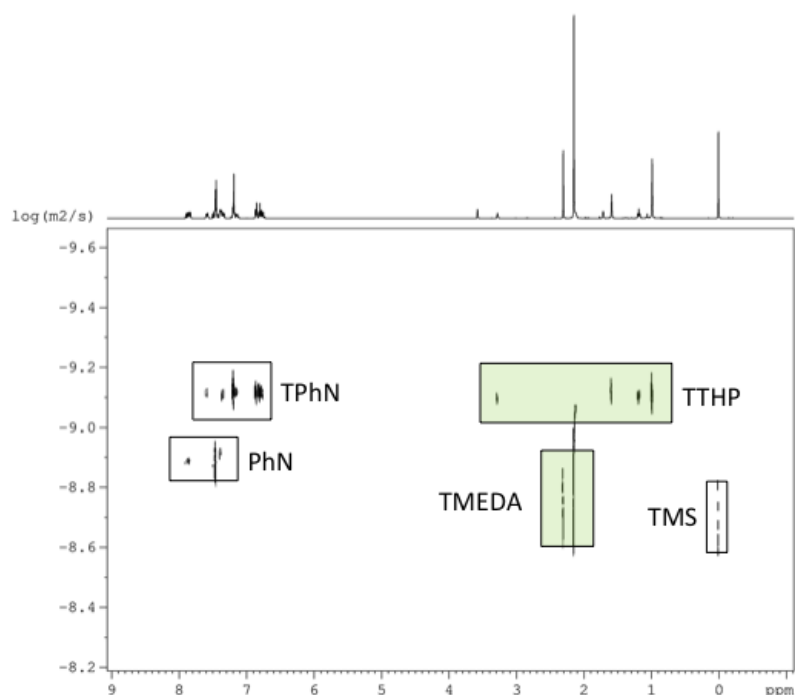

**Figure S28.** <sup>1</sup>H DOSY NMR plot of **2·TMEDA** in *d*<sub>8</sub>-THF solution.

From the D values obtained for the internal standards a linear calibration graph of LogD versus LogMW was obtained (Figure S29), with formula  $\log D = -0.5975(\log MW) - 7.532$ . Using the D values for **2·TMEDA** and the calibration graph, the MW of species in solution were estimated.

**Table S12.** Diffusion coefficients and MW of internal standards for **2b**.

| Standard | MW (gmol <sup>-1</sup> ) | logMW | D (m <sup>2</sup> s <sup>-1</sup> ) | logD   |
|----------|--------------------------|-------|-------------------------------------|--------|
| TPhN     | 432.55                   | 2.636 | 7.57E-10                            | -9.121 |
| PhN      | 204.27                   | 2.310 | 1.30E-9                             | -8.885 |
| TMS      | 88.22                    | 1.946 | 1.96E-9                             | -8.707 |

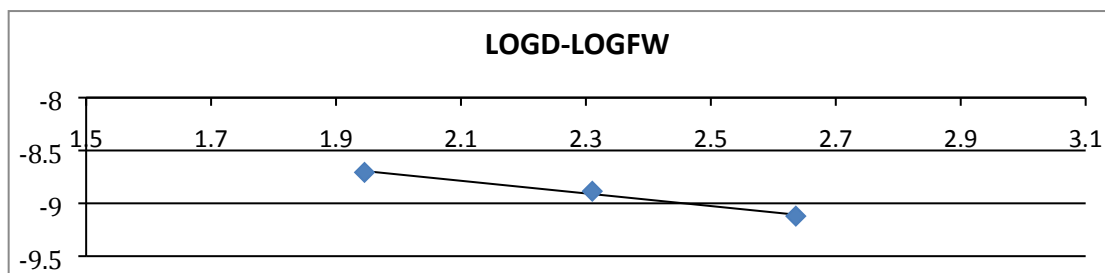

**Figure S29.** Calibration graph ( $\log D = -0.5975(\log MW) - 7.532$ ,  $r^2 = 0.988$ ) used to estimate MW of compound **2·TMEDA** in  $d_8$ -THF solution.

MW found by  $^1\text{H}$  DOSY NMR for **2·TMEDA**, 432.4 g/mol; calc. for **2·( $d_8$ -THF) $_2$**  ( $\text{C}_{24}\text{H}_{28}\text{D}_{16}\text{N}_2\text{Na}_2\text{O}_2$ ), 454.70 g/mol; error, +5%.

The DOSY NMR data in  $d_8$ -THF suggest that TMEDA is replaced by  $d_8$ -THF in **2·TMEDA**, which is consistent with the MW observed. The  $\text{MW}_{\text{DOSY}}$  for non coordinated TMEDA found is 114.19 (MW calculated, 116.2; error: 1.7%).

**<sup>1</sup>H DOSY NMR study of compound TMEDA·NaTTHP (2·TMEDA) in C<sub>6</sub>D<sub>6</sub> solution.**

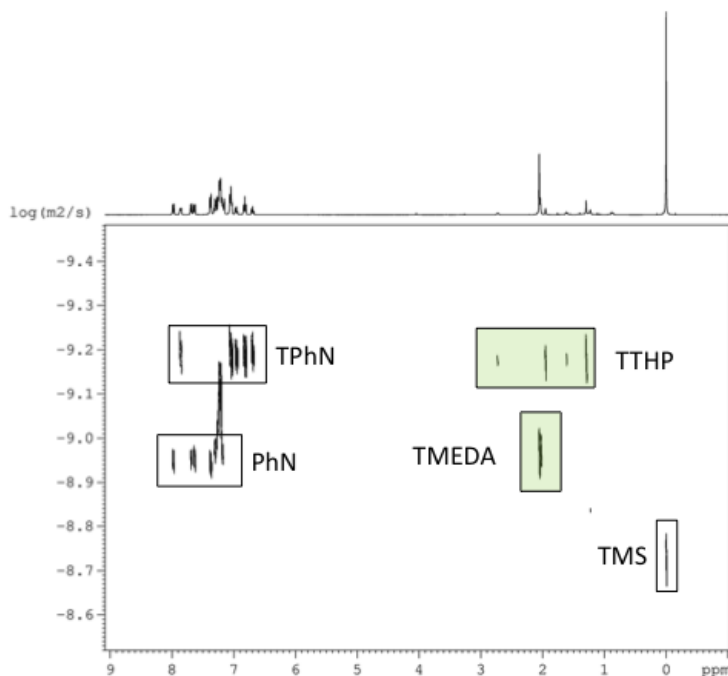

**Figure S30.** <sup>1</sup>H DOSY NMR plot of **2·TMEDA** in C<sub>6</sub>D<sub>6</sub> solution.

From the D values obtained for the internal standards a linear calibration graph of LogD versus LogMW was obtained (Figure S31), with formula  $\log D = -0.6733(\log MW) - 7.4069$ . Using the D values for **2·TMEDA** and the calibration graph, the MW of species in solution were estimated.

**Table S13.** Diffusion coefficients and MW of internal standards for **2·TMEDA**.

| Standard | MW (gmol <sup>-1</sup> ) | logMW | D (m <sup>2</sup> s <sup>-1</sup> ) | logD   |
|----------|--------------------------|-------|-------------------------------------|--------|
| TPhN     | 432.55                   | 2.636 | 6.49E-10                            | -9.188 |
| PhN      | 204.27                   | 2.310 | 1.12E-9                             | -8.951 |
| TMS      | 88.22                    | 1.946 | 1.90E-9                             | -8.722 |

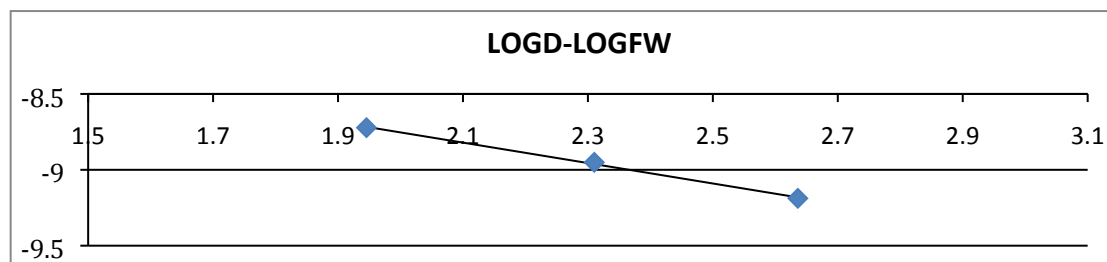

**Figure S31.** Calibration graph ( $\log D = -0.6733(\log MW) - 7.4069$ ,  $r^2 = 0.988$ ) used to estimate MW of compound **2·TMEDA** in  $C_6D_6$  solution.

MW found by  $^1H$  DOSY NMR for **2·TMEDA**, 430.5 g/mol; calc. for **2·(C<sub>6</sub>D<sub>6</sub>)<sub>2</sub>** (C<sub>28</sub>H<sub>28</sub>D<sub>12</sub>N<sub>2</sub>Na<sub>2</sub>), 462.7 g/mol; error, +7%.

The DOSY NMR data in  $C_6D_6$  solution suggest that TMEDA is replaced by  $C_6D_6$  in **2·TMEDA**, which is consistent with the MW observed. The MW<sub>DOSY</sub> for non coordinated TMEDA found is 207.4, slightly higher than the calculated (MW calculated, 116.2; error: +43.9%), possibly due to a dynamic equilibrium in  $C_6D_6$  between  $C_6D_6$  and TMEDA to coordinate to NaTTHP.

**$^1\text{H}$  DOSY NMR study of compound KTTHP (**3**) in  $d_8$ -THF solution.**

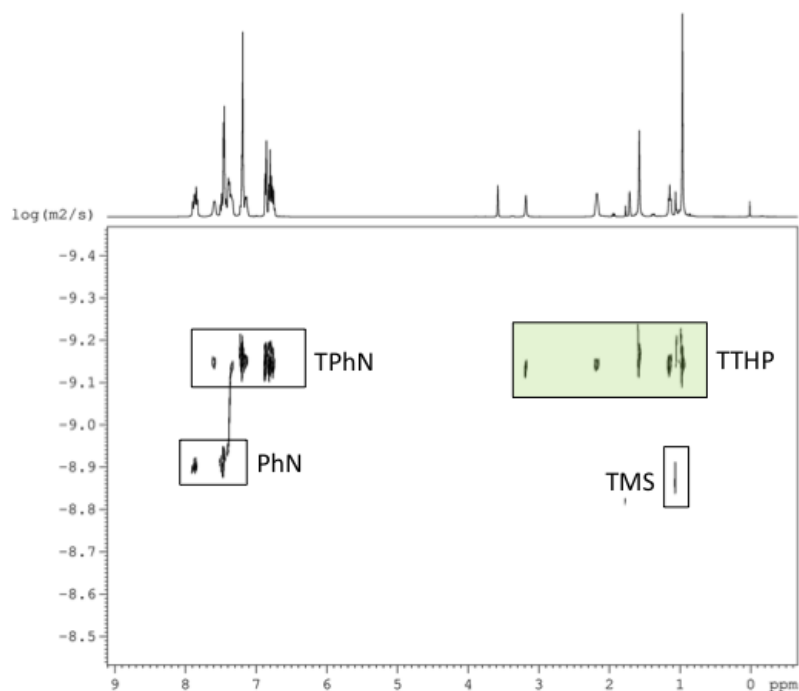

**Figure S32.**  $^1\text{H}$  DOSY NMR plot of **3** in  $d_8$ -THF solution.

From the D values obtained for the internal standards a linear calibration graph of LogD versus LogMW was obtained (Figure S33), with formula  $\log D = -0.5463(\log MW) - 7.6796$ . Using the D values for **3** and the calibration graph, the MW of species in solution were estimated.

**Table S14.** Diffusion coefficients and MW of internal standards for **3**.

| Standard | MW (gmol <sup>-1</sup> ) | logMW | D (m <sup>2</sup> s <sup>-1</sup> ) | logD   |
|----------|--------------------------|-------|-------------------------------------|--------|
| TPhN     | 432.55                   | 2.636 | 7.72E-10                            | -9.142 |
| PhN      | 204.27                   | 2.310 | 1.26E-9                             | -8.900 |
| TMS      | 88.22                    | 1.946 | 1.71E-9                             | -8.762 |

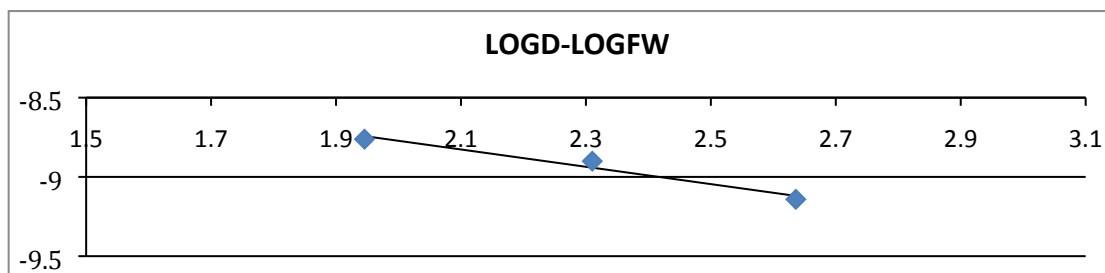

**Figure S33.** Calibration graph ( $\log D = -0.6733(\log MW) - 7.4069$ ,  $r^2 = 0.988$ ) used to estimate MW of compound **3** in  $d_8$ -THF solution.

MW found by  $^1\text{H}$  DOSY NMR for **3**, 468.7 g/mol; calc. for **3**·( $d_8$ -THF)<sub>2</sub> ( $\text{C}_{24}\text{H}_{28}\text{D}_{16}\text{N}_2\text{K}_2\text{O}_2$ ), 486.9 g/mol; error, 4%.

The DOSY NMR data in  $d_8$ -THF solution suggest that **3** exists in  $d_8$ -THF solution as a dimeric KTTTP solvated by two molecules of  $d_8$ -THF.

## IR Spectra

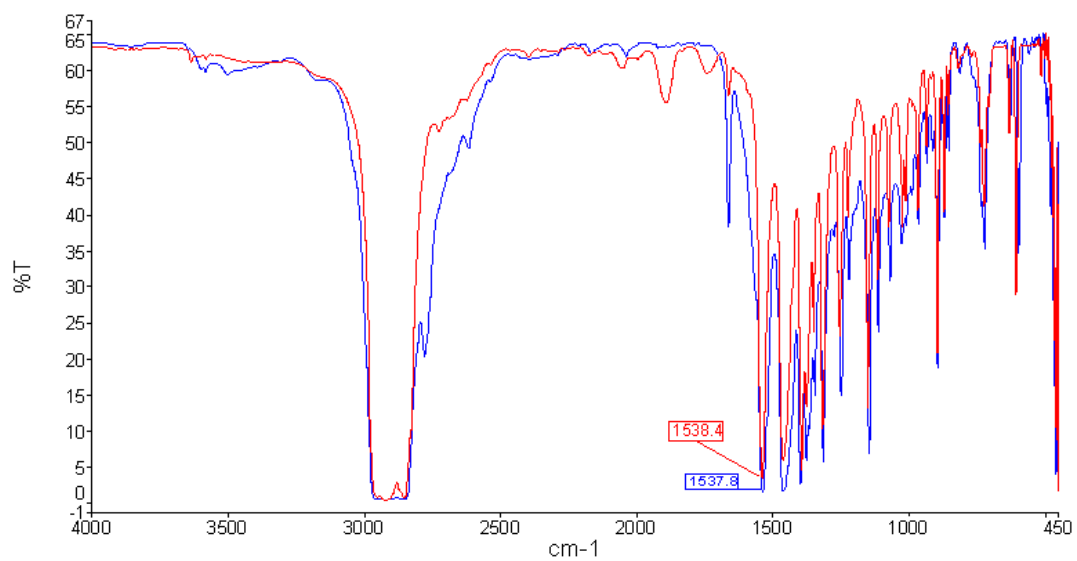

**Figure S34.** IR spectra (KBr, Nujol) for NaTTHP (**2**, red) and KTTHP (**3**, blue).

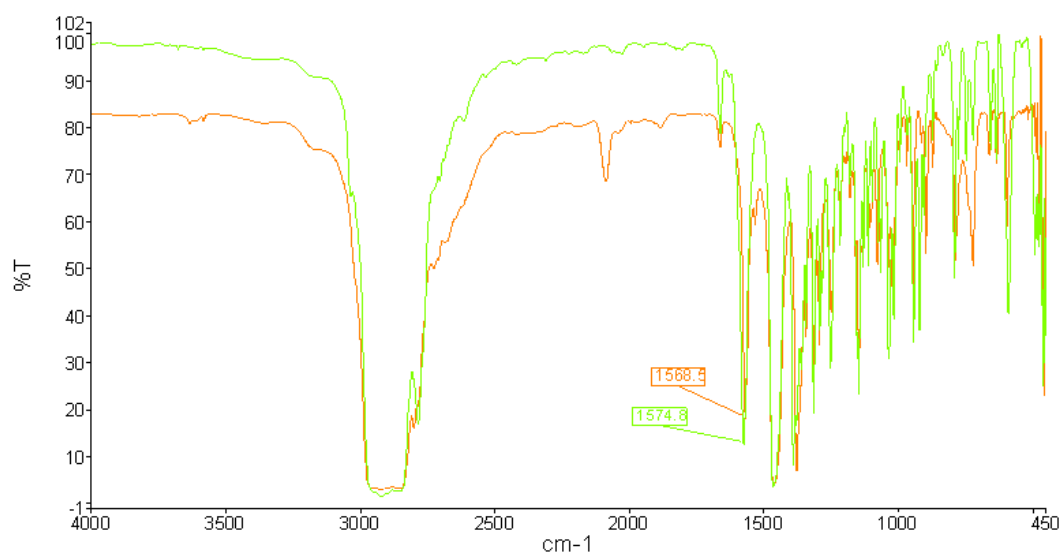

**Figure S35.** IR spectra (KBr, Nujol) for TMEDA·LiTTHP (**1**·TMEDA, green) and TMEDA·NaTTHP (**2**·TMEDA, orange).



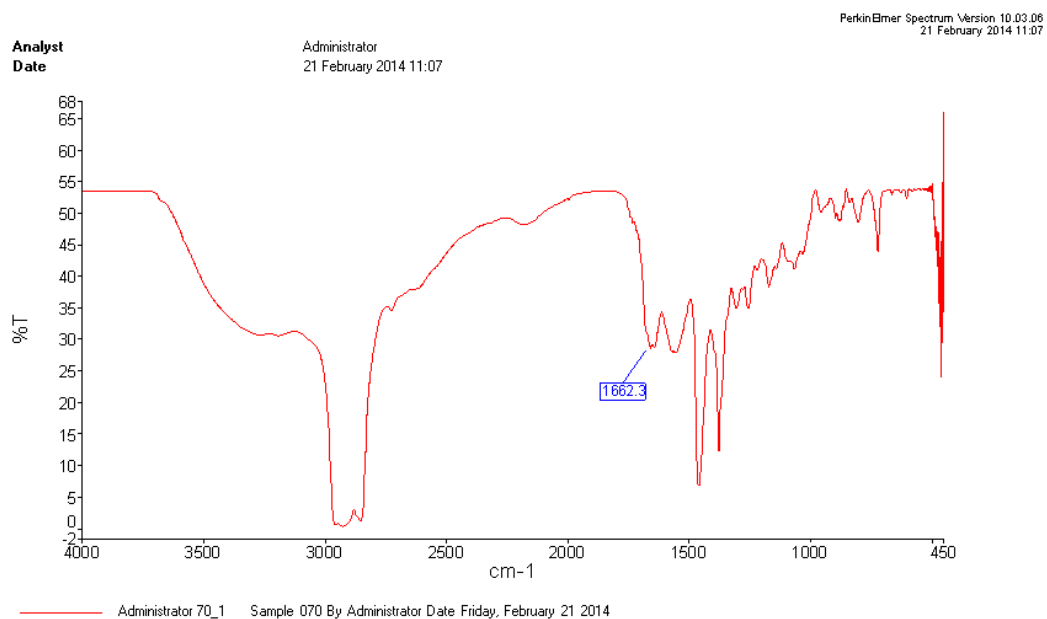

**Figure S36.** IR spectra (KBr, Nujol) for 2,2,6-trimethyl-2,3,4,5-tetrahydropyridine (4).

## **Thermal Volatilisation Analysis (TVA)**

TVA is a form of evolved gas analysis, originally designed for the mechanistic characterization of polymer degradation behaviour but of much wider applicability. The Strathclyde system, built in-house, is based upon the apparatus and techniques originally described by I.C. McNeill in 1966 and developed subsequently.<sup>5</sup>

All TVA runs were conducted under vacuum using 50 mg samples, with the samples heated from ambient temperature to 240°C at a rate of 5°C min<sup>-1</sup>.

### **Description of TVA Technique**

The TVA apparatus consists primarily of a glass sample chamber connected to a primary liquid nitrogen cooled sub-ambient trap and a series of secondary liquid nitrogen cooled cold traps. The entire system is pumped to a vacuum of  $\sim 1 \times 10^{-4}$  Torr by the use of a two-stage rotary pump and an oil diffusion pumping system. As the sample is heated at a linear rate, using a programmable tube furnace, low volatility products (e.g. oligomers) condense at the water jacket cooled ‘cold ring’ placed directly above the sample tube or the liquid nitrogen cooled primary trap. In contrast, higher volatility degradation species with lower boiling points are collected in a primary liquid nitrogen sub-ambient trap, maintained at a temperature of -196°C. These ‘condensable’ fractions are volatile at room temperature but non-volatile at liquid nitrogen temperatures, hence collect within the primary sub-ambient trap. Linear response Pirani gauges, positioned at both the entrance and exit of the primary sub-ambient trap, enables the evolution of both condensable and non-condensable volatiles to be continuously monitored as a function of pressure versus temperature. However, volatile products collected in the cold ring fraction are not detected by Pirani gauges as they condense prior to exiting the degradation tube. Subsequent sub-ambient differential distillation of the collected volatiles was carried out by heating the primary sub-ambient trap from -196°C to ambient temperature. A 1-300 amu Hiden single quadrupole RGA mass spectrometer samples a continuous product stream during both the degradation and sub-ambient distillation runs. This is particularly useful for the identification of non-condensable degradation products such as carbon monoxide and methane and condensable degradation products collected from the sub-ambient distillation procedure.

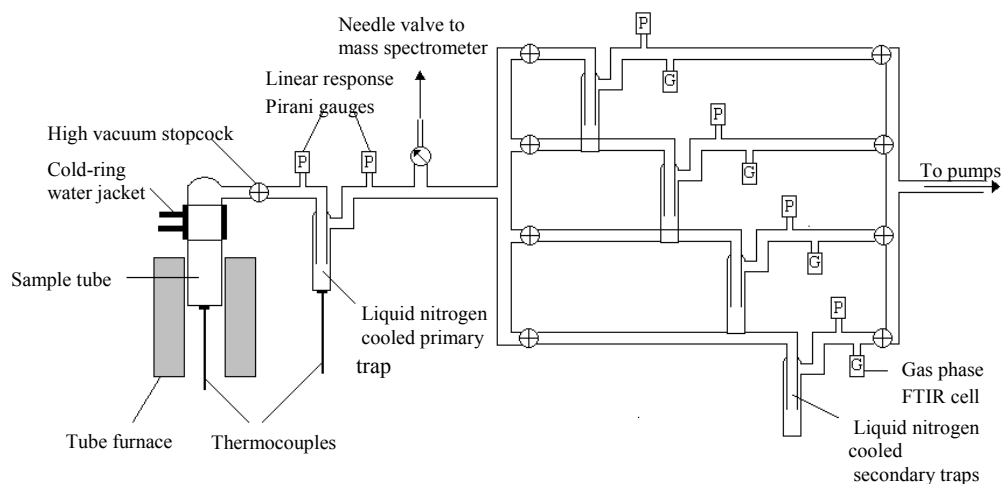

**Figure S37.** Schematic diagram of the TVA system.

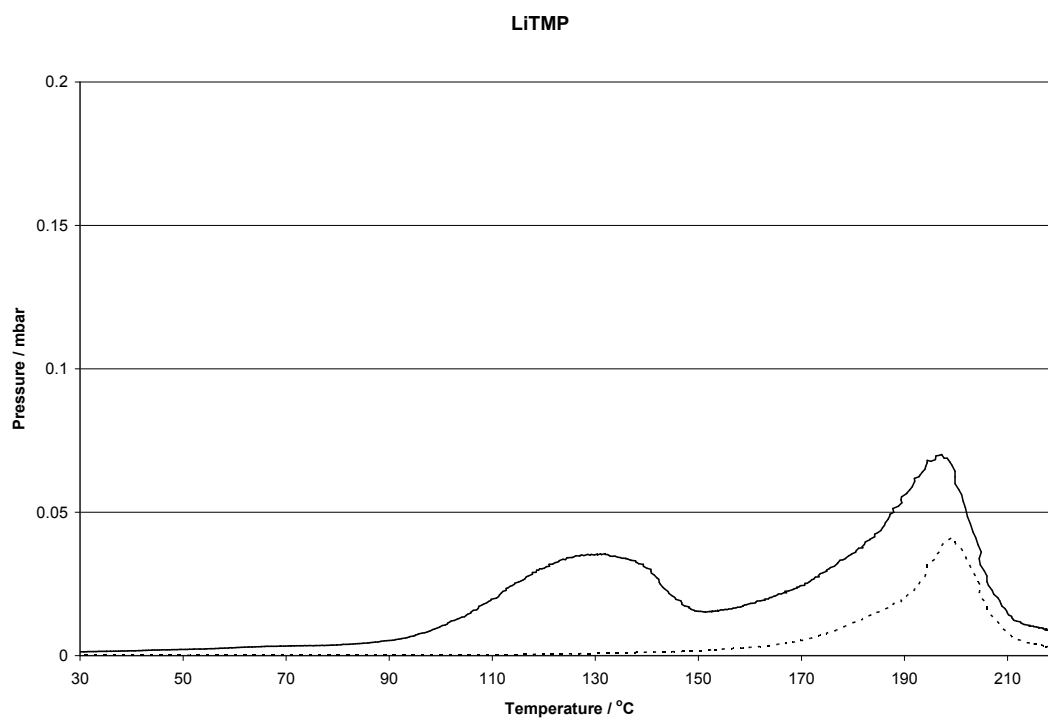

**Figure S38.** TVA thermogram for LiTMP. The solid line represents total volatile products, and the dashed line non-condensable volatile products.

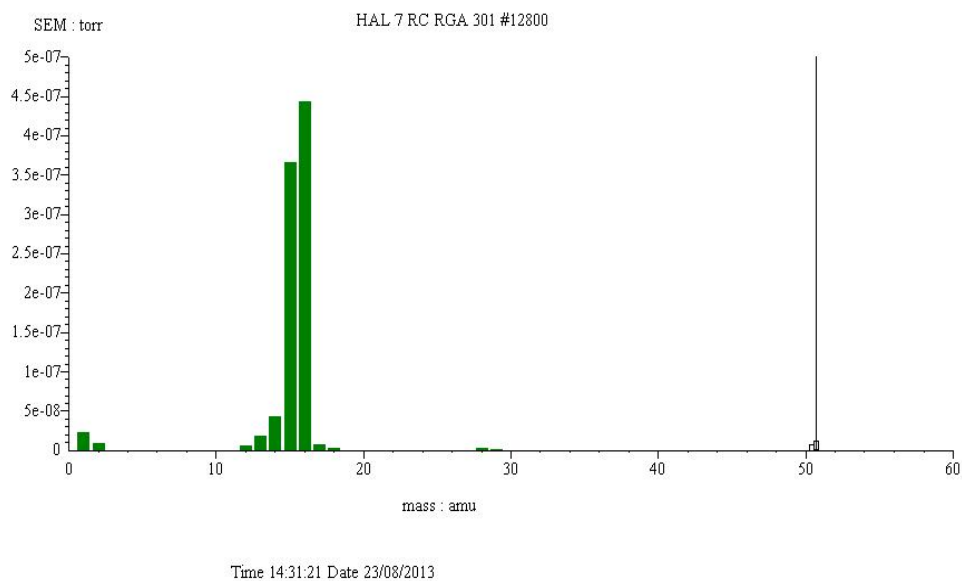

**Figure S39.** Mass spectrum (TVA) non-condensable products released from LiTMP.

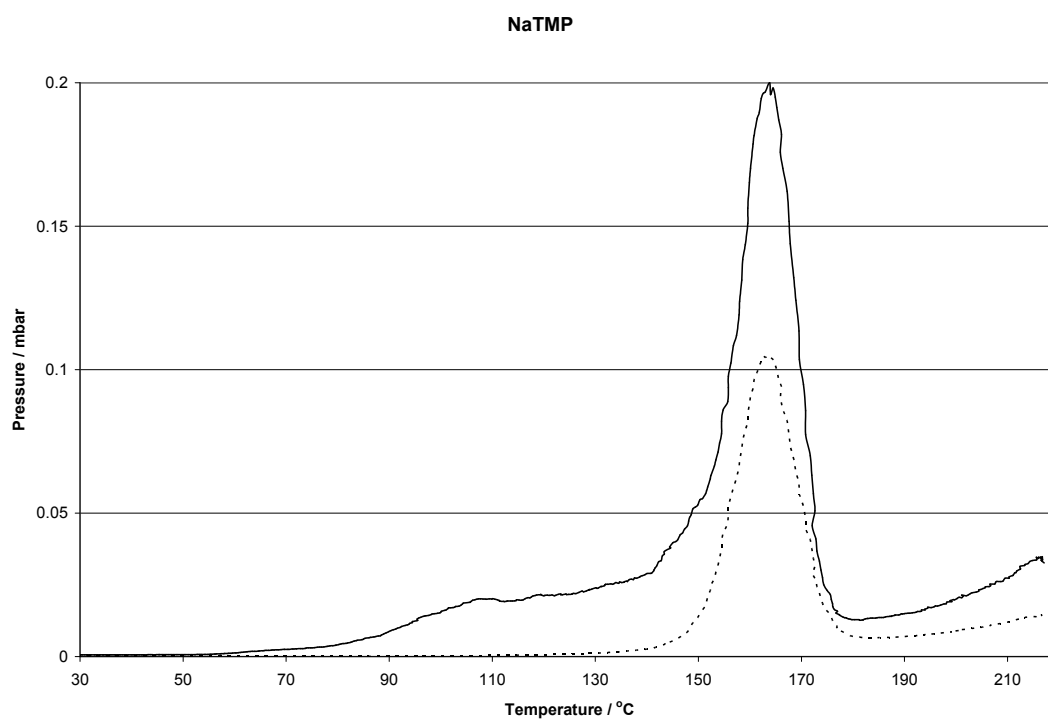

**Figure S40.** TVA thermogram for NaTMP. The solid line represents total volatile products, and the dashed line non-condensable volatile products.

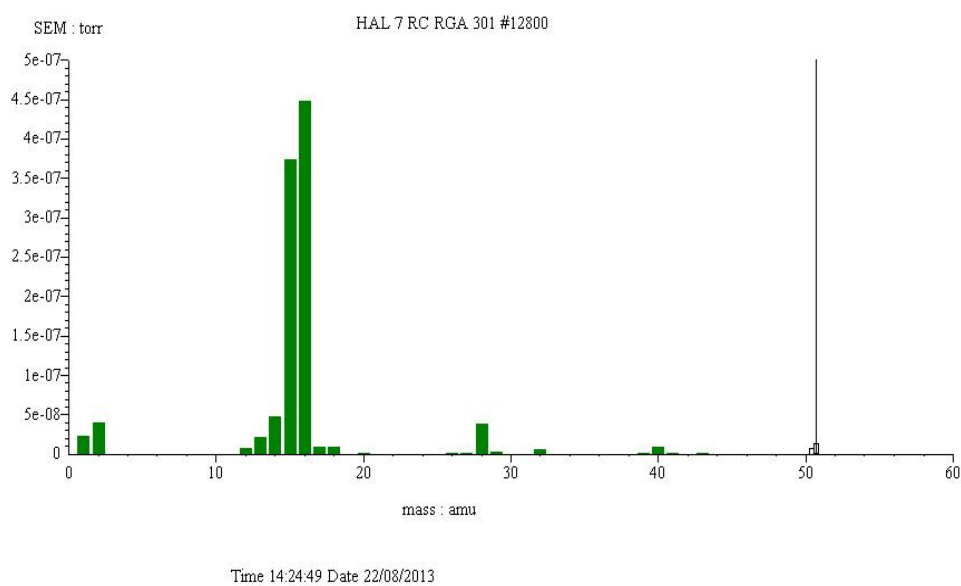

**Figure S41.** Mass spectrum (TVA) non-condensable products released from NaTMP.

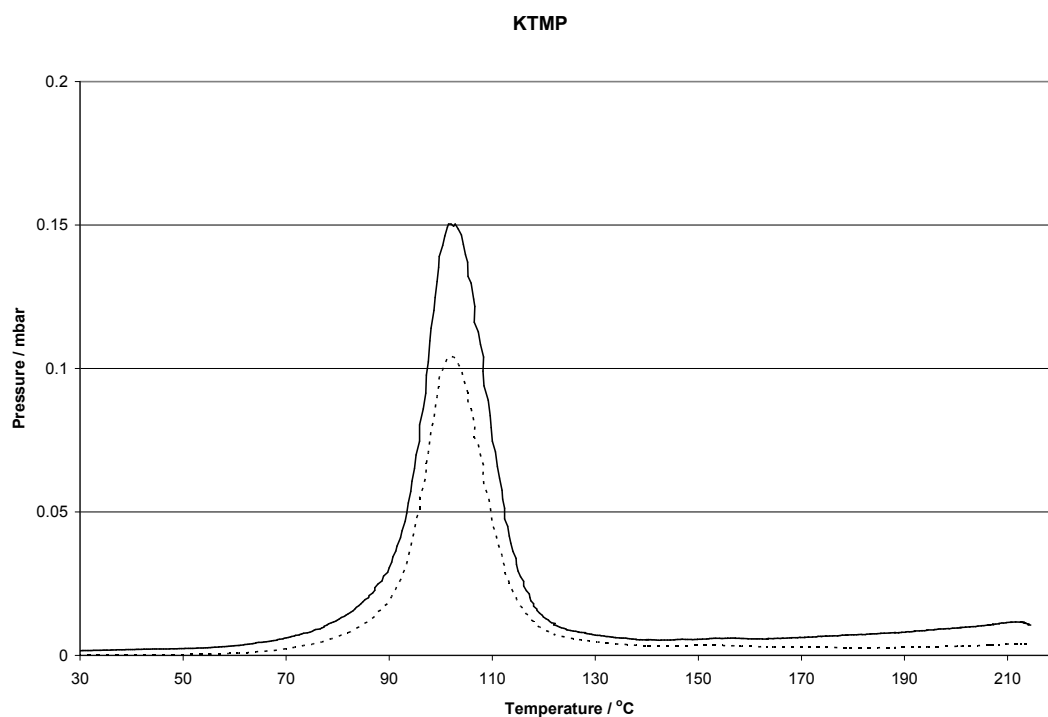

**Figure S42.** TVA thermogram for KTMP. The solid line represents total volatile products, and the dashed line non-condensable volatile products.

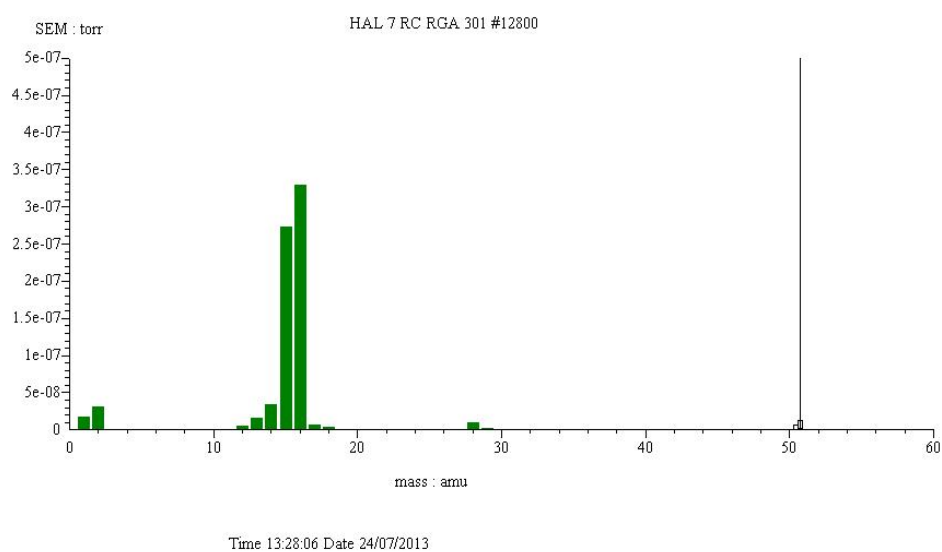

**Figure S43.** Mass spectrum (TVA) non-condensable products released from KTMP.

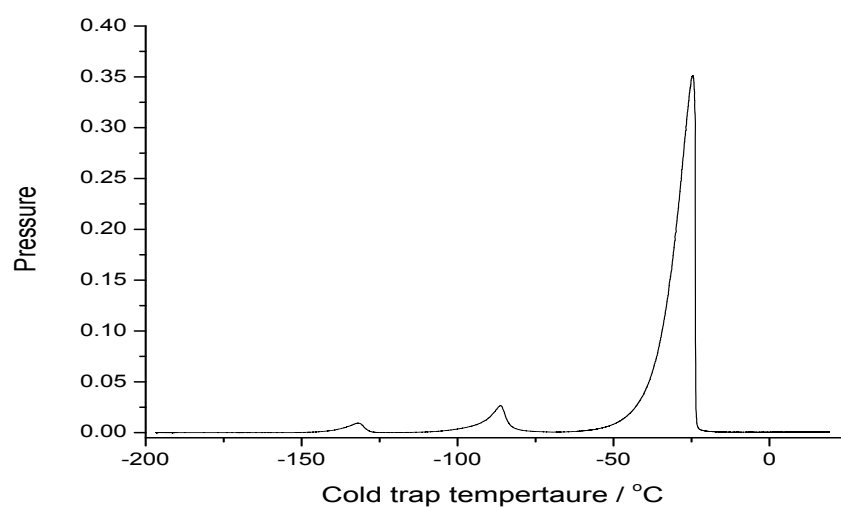

**Figure S44.** Sub-ambient TVA trace for LiTMP (condensable products).

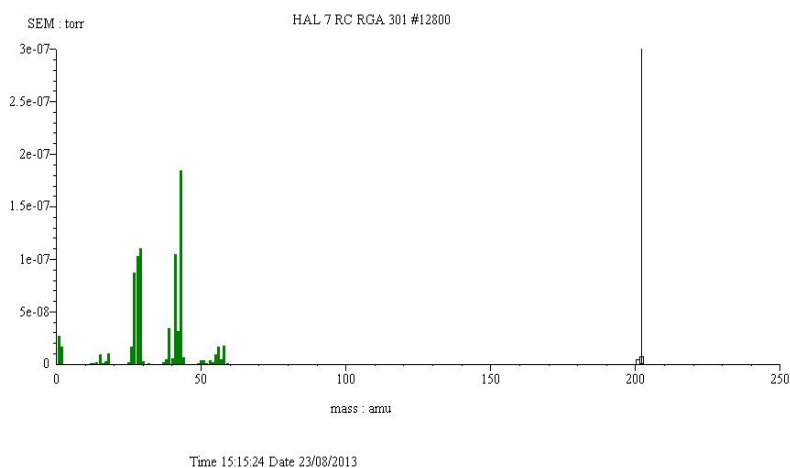

**Figure S45.** Mass spectrum (TVA) corresponding to the first condensable fraction being released from LiTMP.

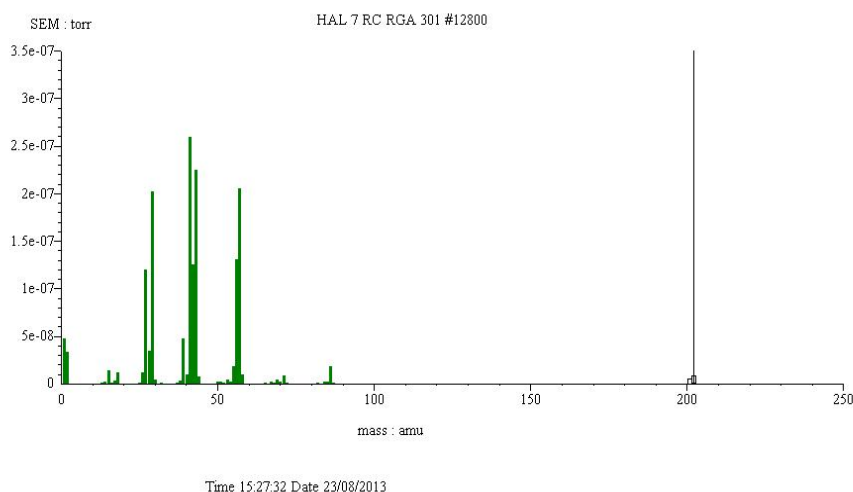

**Figure S46.** Mass spectrum (TVA) corresponding to the second condensable fraction released from LiTMP.

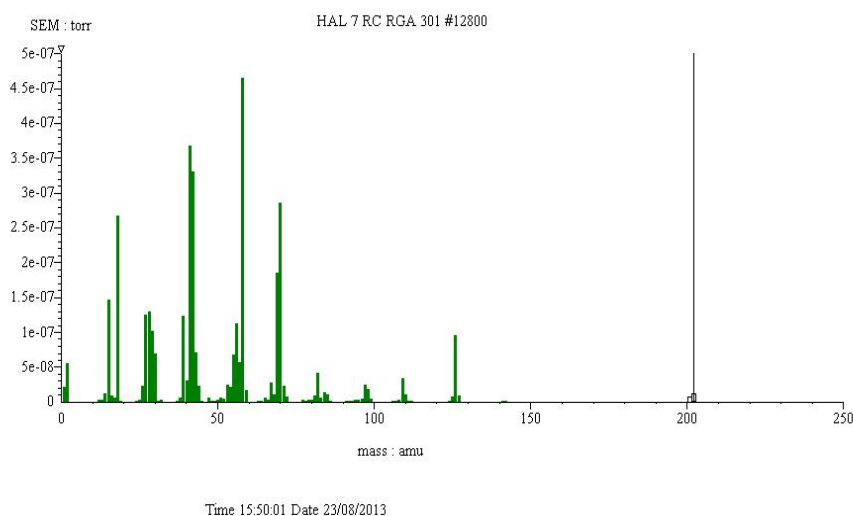

**Figure S47.** Mass spectrum (TVA) corresponding to the third condensable fraction released from LiTMP.

## References

- 1 C. Schade, W. Bauer and P. v. R. Schleyer, *J. Organomet. Chem.*, 1985, **295**, C25.
- 2 B. Conway, D. V. Graham, E. Hevia, A. R. Kennedy, J. Klett and R. E. Mulvey, *Chem. Commun.*, 2008, 2638-2640.
- 3 C. S. Shiner, A. H. Berks and A. M. Fisher, *J. Am. Chem. Soc.*, 1988, **110**, 957-958.
- 4 G. M. Sheldrick, *Acta Cryst. A.*, 2008, **A64**, 112.
- 5 (a) I. C. McNeill, *Eur. Polym. J.*, 1967, **3**, 409-421; (b) I. C. McNeill, *J. Polym. Sci. A1*, 1966, **4**, 2479-2485; (c) I. C. McNeill, *Eur. Polym. J.*, 1970, **6**, 373-395; (d) I. C. McNeill, L. Ackerman, S. N. Gupta, M. Zulfiqar and S. Zulfiqar, *J. Polym. Sci. Polym. Chem. Ed.*, 1977, **15**, 2381-2392; (e) L. Turnbull, J. J. Liggat and W. A. MacDonald, *Polym. Degrad. Stab.*, 2013, **98**, 2244-2258.
